# Supplementary material
Source: MDPI journal article supplement (https://www.mdpi.com/2227-7102/13/11/1112)
Supplement: s1 [file s1]

Tabella delle frequenze

| Sesso  |        |           |             |                    |                        |
|--------|--------|-----------|-------------|--------------------|------------------------|
|        |        | Frequenza | Percentuale | Percentuale valida | Percentuale cumulativa |
| Valido | 1      | 71        | 57,3        | 57,3               | 57,3                   |
|        | 2      | 53        | 42,7        | 42,7               | 100,0                  |
|        | Totale | 124       | 100,0       | 100,0              |                        |

| Titolo di studio |        |           |             |                    |                        |
|------------------|--------|-----------|-------------|--------------------|------------------------|
|                  |        | Frequenza | Percentuale | Percentuale valida | Percentuale cumulativa |
| Valido           | 1      | 6         | 4,8         | 4,8                | 4,8                    |
|                  | 2      | 57        | 46,0        | 46,0               | 50,8                   |
|                  | 3      | 26        | 21,0        | 21,0               | 71,8                   |
|                  | 4      | 35        | 28,2        | 28,2               | 100,0                  |
|                  | Totale | 124       | 100,0       | 100,0              |                        |

| Professione |        |           |             |                    |                        |
|-------------|--------|-----------|-------------|--------------------|------------------------|
|             |        | Frequenza | Percentuale | Percentuale valida | Percentuale cumulativa |
| Valido      | 1      | 50        | 40,3        | 40,3               | 40,3                   |
|             | 2      | 34        | 27,4        | 27,4               | 67,7                   |
|             | 3      | 13        | 10,5        | 10,5               | 78,2                   |
|             | 4      | 11        | 8,9         | 8,9                | 87,1                   |
|             | 5      | 12        | 9,7         | 9,7                | 96,8                   |
|             | 6      | 4         | 3,2         | 3,2                | 100,0                  |
|             | Totale | 124       | 100,0       | 100,0              |                        |

Descrittive

| Statistiche descrittive |  |     |        |         |       |                 |
|-------------------------|--|-----|--------|---------|-------|-----------------|
|                         |  | N   | Minimo | Massimo | Media | Deviazione std. |
| Età                     |  | 124 | 19     | 72      | 35,31 | 12,872          |

|                                     |     |  |  |  |  |
|-------------------------------------|-----|--|--|--|--|
| Numero di casi validi<br>(listwise) | 124 |  |  |  |  |
|-------------------------------------|-----|--|--|--|--|

Frequenze

Tabella delle frequenze

### 1.F.VISO.R.

|   | N   | %     |
|---|-----|-------|
| 0 | 24  | 19,4% |
| 1 | 100 | 80,6% |

### 2.M.VISO.P.

|   | N  | %     |
|---|----|-------|
| 0 | 85 | 68,5% |
| 1 | 39 | 31,5% |

### 3.F.VISO.T.

|   | N   | %     |
|---|-----|-------|
| 0 | 11  | 8,9%  |
| 1 | 113 | 91,1% |

### 4.M.VISO.F.

|   | N   | %     |
|---|-----|-------|
| 0 | 4   | 3,2%  |
| 1 | 120 | 96,8% |

### 5.F.MASC.F

|   | N   | %     |
|---|-----|-------|
| 0 | 14  | 11,3% |
| 1 | 110 | 88,7% |

## 6.M.OCC.R.

|   | N  | %     |
|---|----|-------|
| 0 | 43 | 34,7% |
| 1 | 81 | 65,3% |

## 7.F.NIQ.T.

|   | N  | %     |
|---|----|-------|
| 0 | 35 | 28,2% |
| 1 | 89 | 71,8% |

## 8.F.OCC.R.

|   | N   | %     |
|---|-----|-------|
| 0 | 16  | 12,9% |
| 1 | 108 | 87,1% |

## 9.M.MASC.P.

|   | N   | %     |
|---|-----|-------|
| 0 | 120 | 96,8% |
| 1 | 4   | 3,2%  |

## 10.F.NIQ.DG.

|   | N   | %     |
|---|-----|-------|
| 0 | 117 | 94,4% |
| 1 | 7   | 5,6%  |

## 11.M.MASC.F

|   | N   | %     |
|---|-----|-------|
| 0 | 7   | 5,6%  |
| 1 | 117 | 94,4% |

## 12.F.VISO.S.

|   | N   | %     |
|---|-----|-------|
| 0 | 7   | 5,6%  |
| 1 | 117 | 94,4% |

## 13.M.VISO.T.

|   | N  | %     |
|---|----|-------|
| 0 | 92 | 74,2% |
| 1 | 32 | 25,8% |

#### 14.F.OCC.P.

|   | N  | %     |
|---|----|-------|
| 0 | 93 | 75,0% |
| 1 | 31 | 25,0% |

#### 15.M.MASC.S

|   | N   | %     |
|---|-----|-------|
| 0 | 17  | 13,7% |
| 1 | 107 | 86,3% |

#### 16.M.OCC.DG

|   | N  | %     |
|---|----|-------|
| 0 | 44 | 35,5% |
| 1 | 80 | 64,5% |

#### 17.F.MASC.R.

|   | N  | %     |
|---|----|-------|
| 0 | 32 | 25,8% |
| 1 | 92 | 74,2% |

#### 18.M.MASC.T

|   | N  | %     |
|---|----|-------|
| 0 | 95 | 76,6% |
| 1 | 29 | 23,4% |

#### 19.F.VISO.DP

|   | N  | %     |
|---|----|-------|
| 0 | 49 | 39,5% |
| 1 | 75 | 60,5% |

#### 20.M.OCC.F.

|  | N | % |
|--|---|---|
|--|---|---|

|   |     |       |
|---|-----|-------|
| 0 | 3   | 2,4%  |
| 1 | 121 | 97,6% |

21.F.MASC.T.

|   | N  | %     |
|---|----|-------|
| 0 | 49 | 39,5% |
| 1 | 75 | 60,5% |

22.M.MASC.DG.

|   | N  | %     |
|---|----|-------|
| 0 | 93 | 75,0% |
| 1 | 31 | 25,0% |

23.F.MASC.DP.

|   | N  | %     |
|---|----|-------|
| 0 | 74 | 59,7% |
| 1 | 50 | 40,3% |

24.F.VISO.F.

|   | N   | %     |
|---|-----|-------|
| 0 | 4   | 3,2%  |
| 1 | 120 | 96,8% |

25.M.VISO.S.

|   | N   | %     |
|---|-----|-------|
| 0 | 3   | 2,4%  |
| 1 | 121 | 97,6% |

26.F.NIQ.F.

|   | N   | %     |
|---|-----|-------|
| 0 | 4   | 3,2%  |
| 1 | 120 | 96,8% |

27.F.OCC.T.

|   | N  | %     |
|---|----|-------|
| 0 | 25 | 20,2% |

|   |    |       |
|---|----|-------|
| 1 | 99 | 79,8% |
|---|----|-------|

### 28.M.VISO.DP.

|   | N  | %     |
|---|----|-------|
| 0 | 55 | 44,4% |
| 1 | 69 | 55,6% |

### 29.F.MASC.S.

|   | N   | %     |
|---|-----|-------|
| 0 | 14  | 11,3% |
| 1 | 110 | 88,7% |

### 30.M.OCC.T.

|   | N  | %     |
|---|----|-------|
| 0 | 92 | 74,2% |
| 1 | 32 | 25,8% |

### 31.F.VISO.P.

|   | N  | %     |
|---|----|-------|
| 0 | 34 | 27,4% |
| 1 | 90 | 72,6% |

### 32.M.MASC.R

|   | N  | %     |
|---|----|-------|
| 0 | 30 | 24,2% |
| 1 | 94 | 75,8% |

### 33.F.OCC.F.

|   | N   | %     |
|---|-----|-------|
| 0 | 5   | 4,0%  |
| 1 | 119 | 96,0% |

### 34.F.NIQ.P.

|   | N  | %     |
|---|----|-------|
| 0 | 55 | 44,4% |
| 1 | 69 | 55,6% |

### 35.F.OCC.S.

|   | N   | %     |
|---|-----|-------|
| 0 | 20  | 16,1% |
| 1 | 104 | 83,9% |

### 36.M.VISO.DG

|   | N  | %     |
|---|----|-------|
| 0 | 35 | 28,2% |
| 1 | 89 | 71,8% |

### 37.F.NIQ.S.

|   | N  | %     |
|---|----|-------|
| 0 | 46 | 37,1% |
| 1 | 78 | 62,9% |

### 38.F.OCC.DG.

|   | N  | %     |
|---|----|-------|
| 0 | 30 | 24,2% |
| 1 | 94 | 75,8% |

### 39.M.VISO.R.

|   | N  | %     |
|---|----|-------|
| 0 | 55 | 44,4% |
| 1 | 69 | 55,6% |

### 40.F.MASC.P.

|   | N  | %     |
|---|----|-------|
| 0 | 43 | 34,7% |
| 1 | 81 | 65,3% |

### 41.M.OCC.DP.

|   | N  | %     |
|---|----|-------|
| 0 | 60 | 48,4% |
| 1 | 64 | 51,6% |

**42.F.NIQ.R.**

|   | N   | %     |
|---|-----|-------|
| 0 | 17  | 13,7% |
| 1 | 107 | 86,3% |

**43.F.OCC.DP.**

|   | N  | %     |
|---|----|-------|
| 0 | 50 | 40,3% |
| 1 | 74 | 59,7% |

**44.M.OCC.S.**

|   | N   | %     |
|---|-----|-------|
| 0 | 3   | 2,4%  |
| 1 | 121 | 97,6% |

**45.F.VISO.DG.**

|   | N  | %     |
|---|----|-------|
| 0 | 29 | 23,4% |
| 1 | 95 | 76,6% |

**46.M.OCC.P.**

|   | N  | %     |
|---|----|-------|
| 0 | 81 | 65,3% |
| 1 | 43 | 34,7% |

**47.F.NIQ.DP.**

|   | N  | %     |
|---|----|-------|
| 0 | 81 | 65,3% |
| 1 | 43 | 34,7% |

**48.F.MASC.DG.**

|   | N  | %     |
|---|----|-------|
| 0 | 95 | 76,6% |
| 1 | 29 | 23,4% |



**49.M.MASC.DP.**

|   | N  | %     |
|---|----|-------|
| 0 | 96 | 77,4% |
| 1 | 28 | 22,6% |

Test t

**Statistiche gruppo**

|              | Sesso | N  | Media | Deviazione std. | Errore standard della media |
|--------------|-------|----|-------|-----------------|-----------------------------|
| 1.F.VISO.R.  | 1     | 71 | ,86   | ,350            | ,042                        |
|              | 2     | 53 | ,74   | ,445            | ,061                        |
| 2.M.VISO.P.  | 1     | 71 | ,38   | ,489            | ,058                        |
|              | 2     | 53 | ,23   | ,423            | ,058                        |
| 3.F.VISO.T.  | 1     | 71 | ,92   | ,280            | ,033                        |
|              | 2     | 53 | ,91   | ,295            | ,041                        |
| 4.M.VISO.F.  | 1     | 71 | ,94   | ,232            | ,028                        |
|              | 2     | 53 | 1,00  | ,000            | ,000                        |
| 5.F.MASC.F   | 1     | 71 | ,92   | ,280            | ,033                        |
|              | 2     | 53 | ,85   | ,361            | ,050                        |
| 6.M.OCC.R.   | 1     | 71 | ,75   | ,438            | ,052                        |
|              | 2     | 53 | ,53   | ,504            | ,069                        |
| 7.F.NIQ.T.   | 1     | 71 | ,76   | ,430            | ,051                        |
|              | 2     | 53 | ,66   | ,478            | ,066                        |
| 8.F.OCC.R.   | 1     | 71 | ,90   | ,300            | ,036                        |
|              | 2     | 53 | ,83   | ,379            | ,052                        |
| 9.M.MASC.P.  | 1     | 71 | ,04   | ,203            | ,024                        |
|              | 2     | 53 | ,02   | ,137            | ,019                        |
| 10.F.NIQ.DG. | 1     | 71 | ,08   | ,280            | ,033                        |
|              | 2     | 53 | ,02   | ,137            | ,019                        |
| 11.M.MASC.F  | 1     | 71 | ,93   | ,258            | ,031                        |
|              | 2     | 53 | ,96   | ,192            | ,026                        |
| 12.F.VISO.S. | 1     | 71 | ,90   | ,300            | ,036                        |
|              | 2     | 53 | 1,00  | ,000            | ,000                        |
| 13.M.VISO.T. | 1     | 71 | ,34   | ,476            | ,057                        |
|              | 2     | 53 | ,15   | ,361            | ,050                        |
| 14.F.OCC.P.  | 1     | 71 | ,30   | ,460            | ,055                        |
|              | 2     | 53 | ,19   | ,395            | ,054                        |
| 15.M.MASC.S  | 1     | 71 | ,89   | ,318            | ,038                        |
|              | 2     | 53 | ,83   | ,379            | ,052                        |
| 16.M.OCC.DG  | 1     | 71 | ,65   | ,481            | ,057                        |
|              | 2     | 53 | ,64   | ,484            | ,067                        |

|               |   |    |      |      |      |
|---------------|---|----|------|------|------|
| 17.F.MASC.R.  | 1 | 71 | ,77  | ,421 | ,050 |
|               | 2 | 53 | ,70  | ,463 | ,064 |
| 18.M.MASC.T   | 1 | 71 | ,31  | ,466 | ,055 |
|               | 2 | 53 | ,13  | ,342 | ,047 |
| 19.F.VISO.DP  | 1 | 71 | ,58  | ,497 | ,059 |
|               | 2 | 53 | ,64  | ,484 | ,067 |
| 20.M.OCC.F.   | 1 | 71 | ,97  | ,167 | ,020 |
|               | 2 | 53 | ,98  | ,137 | ,019 |
| 21.F.MASC.T.  | 1 | 71 | ,66  | ,476 | ,057 |
|               | 2 | 53 | ,53  | ,504 | ,069 |
| 22.M.MASC.DG. | 1 | 71 | ,31  | ,466 | ,055 |
|               | 2 | 53 | ,17  | ,379 | ,052 |
| 23.F.MASC.DP. | 1 | 71 | ,39  | ,492 | ,058 |
|               | 2 | 53 | ,42  | ,497 | ,068 |
| 24.F.VISO.F.  | 1 | 71 | ,96  | ,203 | ,024 |
|               | 2 | 53 | ,98  | ,137 | ,019 |
| 25.M.VISO.S.  | 1 | 71 | ,99  | ,119 | ,014 |
|               | 2 | 53 | ,96  | ,192 | ,026 |
| 26.F.NIQ.F.   | 1 | 71 | ,97  | ,167 | ,020 |
|               | 2 | 53 | ,96  | ,192 | ,026 |
| 27.F.OCC.T.   | 1 | 71 | ,83  | ,377 | ,045 |
|               | 2 | 53 | ,75  | ,434 | ,060 |
| 28.M.VISO.DP. | 1 | 71 | ,54  | ,502 | ,060 |
|               | 2 | 53 | ,58  | ,497 | ,068 |
| 29.F.MASC.S.  | 1 | 71 | ,87  | ,335 | ,040 |
|               | 2 | 53 | ,91  | ,295 | ,041 |
| 30.M.OCC.T.   | 1 | 71 | ,37  | ,485 | ,058 |
|               | 2 | 53 | ,11  | ,320 | ,044 |
| 31.F.VISO.P.  | 1 | 71 | ,76  | ,430 | ,051 |
|               | 2 | 53 | ,68  | ,471 | ,065 |
| 32.M.MASC.R   | 1 | 71 | ,75  | ,438 | ,052 |
|               | 2 | 53 | ,77  | ,423 | ,058 |
| 33.F.OCC.F.   | 1 | 71 | ,93  | ,258 | ,031 |
|               | 2 | 53 | 1,00 | ,000 | ,000 |
| 34.F.NIQ.P.   | 1 | 71 | ,62  | ,489 | ,058 |
|               | 2 | 53 | ,47  | ,504 | ,069 |
| 35.F.OCC.S.   | 1 | 71 | ,82  | ,390 | ,046 |
|               | 2 | 53 | ,87  | ,342 | ,047 |
| 36.M.VISO.DG  | 1 | 71 | ,72  | ,453 | ,054 |
|               | 2 | 53 | ,72  | ,455 | ,062 |
| 37.F.NIQ.S.   | 1 | 71 | ,62  | ,489 | ,058 |
|               | 2 | 53 | ,64  | ,484 | ,067 |
| 38.F.OCC.DG.  | 1 | 71 | ,76  | ,430 | ,051 |
|               | 2 | 53 | ,75  | ,434 | ,060 |
| 39.M.VISO.R.  | 1 | 71 | ,59  | ,495 | ,059 |
|               | 2 | 53 | ,51  | ,505 | ,069 |

|               |   |    |        |        |        |
|---------------|---|----|--------|--------|--------|
| 40.F.MASC.P.  | 1 | 71 | ,70    | ,460   | ,055   |
|               | 2 | 53 | ,58    | ,497   | ,068   |
| 41.M.OCC.DP.  | 1 | 71 | ,52    | ,503   | ,060   |
|               | 2 | 53 | ,51    | ,505   | ,069   |
| 42.F.NIQ.R.   | 1 | 71 | ,89    | ,318   | ,038   |
|               | 2 | 53 | ,83    | ,379   | ,052   |
| 43.F.OCC.DP.  | 1 | 71 | ,55    | ,501   | ,059   |
|               | 2 | 53 | ,66    | ,478   | ,066   |
| 44.M.OCC.S.   | 1 | 71 | ,97    | ,167   | ,020   |
|               | 2 | 53 | ,98    | ,137   | ,019   |
| 45.F.VISO.DG. | 1 | 71 | ,77    | ,421   | ,050   |
|               | 2 | 53 | ,75    | ,434   | ,060   |
| 46.M.OCC.P.   | 1 | 71 | ,46    | ,502   | ,060   |
|               | 2 | 53 | ,19    | ,395   | ,054   |
| 47.F.NIQ.DP.  | 1 | 71 | ,38    | ,489   | ,058   |
|               | 2 | 53 | ,30    | ,463   | ,064   |
| 48.F.MASC.DG. | 1 | 71 | ,25    | ,438   | ,052   |
|               | 2 | 53 | ,21    | ,409   | ,056   |
| 49.M.MASC.DP. | 1 | 71 | ,18    | ,390   | ,046   |
|               | 2 | 53 | ,28    | ,455   | ,062   |
| EI            | 1 | 71 | 3,6893 | ,28319 | ,03361 |
|               | 2 | 53 | 3,6026 | ,32781 | ,04503 |

## Test campioni indipendenti

Test di Levene  
per l'eguaglianza  
delle varianze

Test t per l'eguaglianza delle medie

|                 |                                    | Test di Levene<br>per l'eguaglianza<br>delle varianze |       | Test t per l'eguaglianza delle medie |             |                          |                               |                                  |                                                        |               |
|-----------------|------------------------------------|-------------------------------------------------------|-------|--------------------------------------|-------------|--------------------------|-------------------------------|----------------------------------|--------------------------------------------------------|---------------|
|                 |                                    | F                                                     | Sign. | t                                    | gl          | Sign. (a<br>due<br>code) | Differen<br>za della<br>media | Differen<br>za<br>errore<br>std. | Intervallo di<br>confidenza della<br>differenza di 95% |               |
|                 |                                    |                                                       |       |                                      |             |                          |                               |                                  | Inferior<br>e                                          | Superio<br>re |
| 1.F.VISO<br>.R. | Varianze<br>uguali<br>presunte     | 11,853                                                | ,001  | 1,72<br>6                            | 122         | ,087                     | ,123                          | ,071                             | -,018                                                  | ,265          |
|                 | Varianze<br>uguali non<br>presunte |                                                       |       | 1,66<br>8                            | 95,9<br>70  | ,099                     | ,123                          | ,074                             | -,023                                                  | ,270          |
| 2.M.VIS<br>O.P. | Varianze<br>uguali<br>presunte     | 14,507                                                | ,000  | 1,83<br>6                            | 122         | ,069                     | ,154                          | ,084                             | -,012                                                  | ,320          |
|                 | Varianze<br>uguali non<br>presunte |                                                       |       | 1,87<br>5                            | 119,<br>336 | ,063                     | ,154                          | ,082                             | -,009                                                  | ,316          |

|                  |                                    |        |      |                |             |                    |       |      |       |       |
|------------------|------------------------------------|--------|------|----------------|-------------|--------------------|-------|------|-------|-------|
| 3.F.VISO<br>.T.  | Varianze<br>uguali<br>presunte     | ,143   | ,706 | ,189           | 122         | ,850               | ,010  | ,052 | -,093 | ,113  |
|                  | Varianze<br>uguali non<br>presunte |        |      | ,188           | 108,<br>886 | ,852               | ,010  | ,052 | -,094 | ,114  |
| 4.M.VIS<br>O.F.  | Varianze<br>uguali<br>presunte     | 14,084 | ,000 | -<br>1,76<br>4 | 122         | ,080               | -,056 | ,032 | -,120 | ,007  |
|                  | Varianze<br>uguali non<br>presunte |        |      | -<br>2,04<br>4 | 70,0<br>00  | <b><u>,045</u></b> | -,056 | ,028 | -,111 | -,001 |
| 5.F.MAS<br>C.F   | Varianze<br>uguali<br>presunte     | 5,379  | ,022 | 1,15<br>3      | 122         | ,251               | ,066  | ,058 | -,048 | ,180  |
|                  | Varianze<br>uguali non<br>presunte |        |      | 1,11<br>2      | 94,9<br>16  | ,269               | ,066  | ,060 | -,052 | ,185  |
| 6.M.OCC<br>.R.   | Varianze<br>uguali<br>presunte     | 16,092 | ,000 | 2,57<br>2      | 122         | <b><u>,011</u></b> | ,218  | ,085 | ,050  | ,386  |
|                  | Varianze<br>uguali non<br>presunte |        |      | 2,52<br>0      | 102,<br>894 | ,013               | ,218  | ,087 | ,046  | ,390  |
| 7.F.NIQ.<br>T.   | Varianze<br>uguali<br>presunte     | 5,563  | ,020 | 1,22<br>4      | 122         | ,223               | ,100  | ,082 | -,062 | ,262  |
|                  | Varianze<br>uguali non<br>presunte |        |      | 1,20<br>5      | 105,<br>213 | ,231               | ,100  | ,083 | -,065 | ,265  |
| 8.F.OCC.<br>R.   | Varianze<br>uguali<br>presunte     | 5,489  | ,021 | 1,16<br>7      | 122         | ,245               | ,071  | ,061 | -,050 | ,192  |
|                  | Varianze<br>uguali non<br>presunte |        |      | 1,12<br>9      | 96,4<br>02  | ,262               | ,071  | ,063 | -,054 | ,196  |
| 9.M.MAS<br>C.P.  | Varianze<br>uguali<br>presunte     | 2,153  | ,145 | ,725           | 122         | ,470               | ,023  | ,032 | -,040 | ,087  |
|                  | Varianze<br>uguali non<br>presunte |        |      | ,765           | 120,<br>993 | ,446               | ,023  | ,031 | -,037 | ,084  |
| 10.F.NIQ<br>.DG. | Varianze<br>uguali<br>presunte     | 10,910 | ,001 | 1,57<br>0      | 122         | ,119               | ,066  | ,042 | -,017 | ,148  |

|               |                              |        |      |        |         |             |       |      |       |       |
|---------------|------------------------------|--------|------|--------|---------|-------------|-------|------|-------|-------|
|               | Varianze uguali non presunte |        |      | 1,717  | 107,363 | ,089        | ,066  | ,038 | -,010 | ,141  |
| 11.M.MA SC.F  | Varianze uguali presunte     | 2,479  | ,118 | -,776  | 122     | ,439        | -,033 | ,042 | -,116 | ,051  |
|               | Varianze uguali non presunte |        |      | -,809  | 121,999 | ,420        | -,033 | ,040 | -,113 | ,047  |
| 12.F.VIS O.S. | Varianze uguali presunte     | 28,761 | ,000 | -2,388 | 122     | <u>,018</u> | -,099 | ,041 | -,180 | -,017 |
|               | Varianze uguali non presunte |        |      | -2,767 | 70,000  | ,007        | -,099 | ,036 | -,170 | -,028 |
| 13.M.VIS O.T. | Varianze uguali presunte     | 27,194 | ,000 | 2,390  | 122     | <u>,018</u> | ,187  | ,078 | ,032  | ,342  |
|               | Varianze uguali non presunte |        |      | 2,486  | 121,959 | ,014        | ,187  | ,075 | ,038  | ,336  |
| 14.F.OC C.P.  | Varianze uguali presunte     | 8,044  | ,005 | 1,362  | 122     | ,176        | ,107  | ,079 | -,049 | ,263  |
|               | Varianze uguali non presunte |        |      | 1,392  | 119,530 | ,167        | ,107  | ,077 | -,045 | ,259  |
| 15.M.MA SC.S  | Varianze uguali presunte     | 3,310  | ,071 | ,911   | 122     | ,364        | ,057  | ,063 | -,067 | ,181  |
|               | Varianze uguali non presunte |        |      | ,888   | 100,502 | ,377        | ,057  | ,064 | -,071 | ,185  |
| 16.M.OC C.DG  | Varianze uguali presunte     | ,021   | ,885 | ,073   | 122     | ,942        | ,006  | ,088 | -,167 | ,180  |
|               | Varianze uguali non presunte |        |      | ,073   | 111,783 | ,942        | ,006  | ,088 | -,167 | ,180  |
| 17.F.MA SC.R. | Varianze uguali presunte     | 3,529  | ,063 | ,959   | 122     | ,339        | ,077  | ,080 | -,081 | ,234  |
|               | Varianze uguali non presunte |        |      | ,946   | 105,897 | ,346        | ,077  | ,081 | -,084 | ,237  |

|                   |                                    |        |      |           |             |             |       |      |       |      |
|-------------------|------------------------------------|--------|------|-----------|-------------|-------------|-------|------|-------|------|
| 18.M.MA<br>SC.T   | Varianze<br>uguali<br>presunte     | 26,575 | ,000 | 2,34<br>6 | 122         | <u>,021</u> | ,178  | ,076 | ,028  | ,328 |
|                   | Varianze<br>uguali non<br>presunte |        |      | 2,45<br>1 | 121,<br>975 | ,016        | ,178  | ,073 | ,034  | ,321 |
| 19.F.VIS<br>O.DP  | Varianze<br>uguali<br>presunte     | 2,092  | ,151 | -,717     | 122         | ,475        | -,064 | ,089 | -,241 | ,113 |
|                   | Varianze<br>uguali non<br>presunte |        |      | -,720     | 113,<br>770 | ,473        | -,064 | ,089 | -,240 | ,112 |
| 20.M.OC<br>C.F.   | Varianze<br>uguali<br>presunte     | ,441   | ,508 | -,331     | 122         | ,741        | -,009 | ,028 | -,065 | ,046 |
|                   | Varianze<br>uguali non<br>presunte |        |      | -,340     | 120,<br>751 | ,734        | -,009 | ,027 | -,063 | ,045 |
| 21.F.MA<br>SC.T.  | Varianze<br>uguali<br>presunte     | 5,604  | ,019 | 1,50<br>8 | 122         | ,134        | ,134  | ,089 | -,042 | ,309 |
|                   | Varianze<br>uguali non<br>presunte |        |      | 1,49<br>6 | 108,<br>610 | ,138        | ,134  | ,089 | -,043 | ,311 |
| 22.M.MA<br>SC.DG. | Varianze<br>uguali<br>presunte     | 14,419 | ,000 | 1,79<br>0 | 122         | ,076        | ,140  | ,078 | -,015 | ,295 |
|                   | Varianze<br>uguali non<br>presunte |        |      | 1,84<br>4 | 121,<br>044 | ,068        | ,140  | ,076 | -,010 | ,290 |
| 23.F.MA<br>SC.DP. | Varianze<br>uguali<br>presunte     | ,205   | ,652 | -,231     | 122         | ,818        | -,021 | ,090 | -,198 | ,157 |
|                   | Varianze<br>uguali non<br>presunte |        |      | -,231     | 111,<br>527 | ,818        | -,021 | ,090 | -,199 | ,157 |
| 24.F.VIS<br>O.F.  | Varianze<br>uguali<br>presunte     | 2,153  | ,145 | -,725     | 122         | ,470        | -,023 | ,032 | -,087 | ,040 |
|                   | Varianze<br>uguali non<br>presunte |        |      | -,765     | 120,<br>993 | ,446        | -,023 | ,031 | -,084 | ,037 |
| 25.M.VIS<br>O.S.  | Varianze<br>uguali<br>presunte     | 2,891  | ,092 | ,844      | 122         | ,401        | ,024  | ,028 | -,032 | ,079 |

|                   |                                    |        |      |           |             |             |       |      |       |      |
|-------------------|------------------------------------|--------|------|-----------|-------------|-------------|-------|------|-------|------|
|                   | Varianze<br>uguali non<br>presunte |        |      | ,790      | 80,8<br>91  | ,432        | ,024  | ,030 | -,036 | ,083 |
| 26.F.NIQ<br>.F.   | Varianze<br>uguali<br>presunte     | ,350   | ,555 | ,296      | 122         | ,768        | ,010  | ,032 | -,054 | ,074 |
|                   | Varianze<br>uguali non<br>presunte |        |      | ,290      | 102,<br>639 | ,773        | ,010  | ,033 | -,056 | ,075 |
| 27.F.OC<br>C.T.   | Varianze<br>uguali<br>presunte     | 4,273  | ,041 | 1,04<br>3 | 122         | ,299        | ,076  | ,073 | -,068 | ,221 |
|                   | Varianze<br>uguali non<br>presunte |        |      | 1,02<br>2 | 102,<br>860 | ,309        | ,076  | ,075 | -,072 | ,224 |
| 28.M.VIS<br>O.DP. | Varianze<br>uguali<br>presunte     | 1,150  | ,286 | -,547     | 122         | ,585        | -,050 | ,091 | -,229 | ,130 |
|                   | Varianze<br>uguali non<br>presunte |        |      | -,548     | 112,<br>757 | ,585        | -,050 | ,091 | -,229 | ,130 |
| 29.F.MA<br>SC.S.  | Varianze<br>uguali<br>presunte     | 1,283  | ,260 | -,560     | 122         | ,576        | -,032 | ,058 | -,147 | ,082 |
|                   | Varianze<br>uguali non<br>presunte |        |      | -,571     | 118,<br>630 | ,569        | -,032 | ,057 | -,145 | ,080 |
| 30.M.OC<br>C.T.   | Varianze<br>uguali<br>presunte     | 58,862 | ,000 | 3,29<br>7 | 122         | <u>,001</u> | ,253  | ,077 | ,101  | ,405 |
|                   | Varianze<br>uguali non<br>presunte |        |      | 3,49<br>3 | 120,<br>331 | ,001        | ,253  | ,072 | ,110  | ,396 |
| 31.F.VIS<br>O.P.  | Varianze<br>uguali<br>presunte     | 3,792  | ,054 | 1,00<br>0 | 122         | ,319        | ,081  | ,081 | -,080 | ,242 |
|                   | Varianze<br>uguali non<br>presunte |        |      | ,987      | 106,<br>206 | ,326        | ,081  | ,082 | -,082 | ,245 |
| 32.M.MA<br>SC.R   | Varianze<br>uguali<br>presunte     | ,487   | ,487 | -,346     | 122         | ,730        | -,027 | ,078 | -,182 | ,128 |
|                   | Varianze<br>uguali non<br>presunte |        |      | -,348     | 114,<br>282 | ,729        | -,027 | ,078 | -,181 | ,127 |

|                  |                                    |        |      |                |             |             |       |      |       |       |
|------------------|------------------------------------|--------|------|----------------|-------------|-------------|-------|------|-------|-------|
| 33.F.OC<br>C.F.  | Varianze<br>uguali<br>presunte     | 18,498 | ,000 | -<br>1,98<br>8 | 122         | <u>,049</u> | -,070 | ,035 | -,141 | ,000  |
|                  | Varianze<br>uguali non<br>presunte |        |      | -<br>2,30<br>3 | 70,0<br>00  | ,024        | -,070 | ,031 | -,131 | -,009 |
| 34.F.NIQ<br>.P.  | Varianze<br>uguali<br>presunte     | 2,707  | ,102 | 1,64<br>6      | 122         | ,102        | ,148  | ,090 | -,030 | ,326  |
|                  | Varianze<br>uguali non<br>presunte |        |      | 1,63<br>9      | 110,<br>291 | ,104        | ,148  | ,090 | -,031 | ,327  |
| 35.F.OC<br>C.S.  | Varianze<br>uguali<br>presunte     | 2,393  | ,124 | -,760          | 122         | ,449        | -,051 | ,067 | -,184 | ,082  |
|                  | Varianze<br>uguali non<br>presunte |        |      | -,774          | 118,<br>769 | ,440        | -,051 | ,066 | -,181 | ,079  |
| 36.M.VIS<br>O.DG | Varianze<br>uguali<br>presunte     | ,001   | ,974 | ,016           | 122         | ,987        | ,001  | ,082 | -,162 | ,164  |
|                  | Varianze<br>uguali non<br>presunte |        |      | ,016           | 111,<br>941 | ,987        | ,001  | ,082 | -,162 | ,165  |
| 37.F.NIQ<br>.S.  | Varianze<br>uguali<br>presunte     | ,248   | ,619 | -,247          | 122         | ,806        | -,022 | ,088 | -,197 | ,153  |
|                  | Varianze<br>uguali non<br>presunte |        |      | -,247          | 112,<br>761 | ,805        | -,022 | ,088 | -,197 | ,153  |
| 38.F.OC<br>C.DG. | Varianze<br>uguali<br>presunte     | ,022   | ,882 | ,075           | 122         | ,941        | ,006  | ,078 | -,149 | ,161  |
|                  | Varianze<br>uguali non<br>presunte |        |      | ,074           | 111,<br>526 | ,941        | ,006  | ,078 | -,150 | ,161  |
| 39.M.VIS<br>O.R. | Varianze<br>uguali<br>presunte     | 1,756  | ,188 | ,906           | 122         | ,367        | ,082  | ,091 | -,097 | ,261  |
|                  | Varianze<br>uguali non<br>presunte |        |      | ,904           | 110,<br>988 | ,368        | ,082  | ,091 | -,098 | ,262  |
| 40.F.MA<br>SC.P. | Varianze<br>uguali<br>presunte     | 6,210  | ,014 | 1,38<br>1      | 122         | ,170        | ,119  | ,086 | -,052 | ,290  |



|                   |                                    |        |      |                |             |                    |       |      |       |      |
|-------------------|------------------------------------|--------|------|----------------|-------------|--------------------|-------|------|-------|------|
|                   | Varianze<br>uguali non<br>presunte |        |      | 1,36<br>5      | 107,<br>089 | ,175               | ,119  | ,087 | -,054 | ,293 |
| 41.M.OC<br>C.DP.  | Varianze<br>uguali<br>presunte     | ,052   | ,820 | ,128           | 122         | ,898               | ,012  | ,091 | -,169 | ,193 |
|                   | Varianze<br>uguali non<br>presunte |        |      | ,128           | 111,<br>985 | ,899               | ,012  | ,091 | -,170 | ,193 |
| 42.F.NIQ<br>.R.   | Varianze<br>uguali<br>presunte     | 3,310  | ,071 | ,911           | 122         | ,364               | ,057  | ,063 | -,067 | ,181 |
|                   | Varianze<br>uguali non<br>presunte |        |      | ,888           | 100,<br>502 | ,377               | ,057  | ,064 | -,071 | ,185 |
| 43.F.OC<br>C.DP.  | Varianze<br>uguali<br>presunte     | 5,764  | ,018 | -<br>1,24<br>5 | 122         | ,215               | -,111 | ,089 | -,288 | ,066 |
|                   | Varianze<br>uguali non<br>presunte |        |      | -<br>1,25<br>4 | 114,<br>868 | ,212               | -,111 | ,089 | -,287 | ,064 |
| 44.M.OC<br>C.S.   | Varianze<br>uguali<br>presunte     | ,441   | ,508 | -,331          | 122         | ,741               | -,009 | ,028 | -,065 | ,046 |
|                   | Varianze<br>uguali non<br>presunte |        |      | -,340          | 120,<br>751 | ,734               | -,009 | ,027 | -,063 | ,045 |
| 45.F.VIS<br>O.DG. | Varianze<br>uguali<br>presunte     | ,262   | ,610 | ,257           | 122         | ,797               | ,020  | ,077 | -,133 | ,173 |
|                   | Varianze<br>uguali non<br>presunte |        |      | ,256           | 110,<br>200 | ,798               | ,020  | ,078 | -,134 | ,174 |
| 46.M.OC<br>C.P.   | Varianze<br>uguali<br>presunte     | 41,936 | ,000 | 3,30<br>9      | 122         | <b><u>,001</u></b> | ,276  | ,083 | ,111  | ,441 |
|                   | Varianze<br>uguali non<br>presunte |        |      | 3,42<br>5      | 121,<br>642 | ,001               | ,276  | ,081 | ,117  | ,436 |
| 47.F.NIQ<br>.DP.  | Varianze<br>uguali<br>presunte     | 3,389  | ,068 | ,903           | 122         | ,368               | ,078  | ,087 | -,093 | ,250 |
|                   | Varianze<br>uguali non<br>presunte |        |      | ,910           | 115,<br>214 | ,365               | ,078  | ,086 | -,092 | ,249 |

|                   |                                    |       |      |                |             |      |        |        |         |        |
|-------------------|------------------------------------|-------|------|----------------|-------------|------|--------|--------|---------|--------|
| 48.F.MA<br>SC.DG. | Varianze<br>uguali<br>presunte     | 1,455 | ,230 | ,594           | 122         | ,553 | ,046   | ,077   | -,107   | ,199   |
|                   | Varianze<br>uguali non<br>presunte |       |      | ,600           | 115,<br>954 | ,550 | ,046   | ,077   | -,106   | ,198   |
| 49.M.MA<br>SC.DP. | Varianze<br>uguali<br>presunte     | 6,699 | ,011 | -<br>1,31<br>5 | 122         | ,191 | -,100  | ,076   | -,250   | ,050   |
|                   | Varianze<br>uguali non<br>presunte |       |      | -<br>1,28<br>6 | 101,<br>852 | ,201 | -,100  | ,078   | -,254   | ,054   |
| EI                | Varianze<br>uguali<br>presunte     | ,868  | ,353 | 1,57<br>5      | 122         | ,118 | ,08666 | ,05501 | -,02223 | ,19555 |
|                   | Varianze<br>uguali non<br>presunte |       |      | 1,54<br>2      | 102,<br>455 | ,126 | ,08666 | ,05619 | -,02479 | ,19810 |

A una via

## ANOVA

|             |                | Somma dei<br>quadrati | df  | Media<br>quadratica | F     | Sig. |
|-------------|----------------|-----------------------|-----|---------------------|-------|------|
| 1.F.VISO.R. | Tra gruppi     | 1,012                 | 5   | ,202                | 1,302 | ,268 |
|             | Entro i gruppi | 18,343                | 118 | ,155                |       |      |
|             | Totale         | 19,355                | 123 |                     |       |      |
| 2.M.VISO.P. | Tra gruppi     | ,576                  | 5   | ,115                | ,520  | ,761 |
|             | Entro i gruppi | 26,157                | 118 | ,222                |       |      |
|             | Totale         | 26,734                | 123 |                     |       |      |
| 3.F.VISO.T. | Tra gruppi     | ,143                  | 5   | ,029                | ,342  | ,887 |
|             | Entro i gruppi | 9,881                 | 118 | ,084                |       |      |
|             | Totale         | 10,024                | 123 |                     |       |      |
| 4.M.VISO.F. | Tra gruppi     | ,315                  | 5   | ,063                | 2,088 | ,072 |
|             | Entro i gruppi | 3,556                 | 118 | ,030                |       |      |
|             | Totale         | 3,871                 | 123 |                     |       |      |
| 5.F.MASC.F  | Tra gruppi     | ,671                  | 5   | ,134                | 1,349 | ,249 |
|             | Entro i gruppi | 11,748                | 118 | ,100                |       |      |
|             | Totale         | 12,419                | 123 |                     |       |      |
| 6.M.OCC.R.  | Tra gruppi     | 2,579                 | 5   | ,516                | 2,386 | ,042 |
|             | Entro i gruppi | 25,509                | 118 | ,216                |       |      |
|             | Totale         | 28,089                | 123 |                     |       |      |

|              |                |        |     |      |       |      |
|--------------|----------------|--------|-----|------|-------|------|
| 7.F.NIQ.T.   | Tra gruppi     | ,569   | 5   | ,114 | ,547  | ,740 |
|              | Entro i gruppi | 24,552 | 118 | ,208 |       |      |
|              | Totale         | 25,121 | 123 |      |       |      |
| 8.F.OCC.R.   | Tra gruppi     | ,512   | 5   | ,102 | ,900  | ,484 |
|              | Entro i gruppi | 13,424 | 118 | ,114 |       |      |
|              | Totale         | 13,935 | 123 |      |       |      |
| 9.M.MASC.P.  | Tra gruppi     | ,719   | 5   | ,144 | 5,379 | ,000 |
|              | Entro i gruppi | 3,152  | 118 | ,027 |       |      |
|              | Totale         | 3,871  | 123 |      |       |      |
| 10.F.NIQ.DG. | Tra gruppi     | ,210   | 5   | ,042 | ,776  | ,569 |
|              | Entro i gruppi | 6,395  | 118 | ,054 |       |      |
|              | Totale         | 6,605  | 123 |      |       |      |

A una via

| Descrittive     |            |     |       |                    |                |                                                 |      |        |             |
|-----------------|------------|-----|-------|--------------------|----------------|-------------------------------------------------|------|--------|-------------|
|                 |            | N   | Medio | Deviazione<br>std. | Errore<br>std. | 95% di intervallo di<br>confidenza per la media |      | Minimo | Massim<br>o |
| 1.F.VISO.R      | 1          | 50  | ,76   | ,431               | ,061           | ,64                                             | ,88  | 0      | 1           |
|                 | 2          | 34  | ,76   | ,431               | ,074           | ,61                                             | ,91  | 0      | 1           |
|                 | 3          | 13  | ,92   | ,277               | ,077           | ,76                                             | 1,09 | 0      | 1           |
|                 | 4          | 11  | ,73   | ,467               | ,141           | ,41                                             | 1,04 | 0      | 1           |
|                 | 5          | 12  | 1,00  | ,000               | ,000           | 1,00                                            | 1,00 | 1      | 1           |
|                 | 6          | 4   | 1,00  | ,000               | ,000           | 1,00                                            | 1,00 | 1      | 1           |
|                 | Total<br>e | 124 | ,81   | ,397               | ,036           | ,74                                             | ,88  | 0      | 1           |
| 2.M.VISO.<br>P. | 1          | 50  | ,36   | ,485               | ,069           | ,22                                             | ,50  | 0      | 1           |
|                 | 2          | 34  | ,24   | ,431               | ,074           | ,09                                             | ,39  | 0      | 1           |
|                 | 3          | 13  | ,23   | ,439               | ,122           | -,03                                            | ,50  | 0      | 1           |
|                 | 4          | 11  | ,36   | ,505               | ,152           | ,02                                             | ,70  | 0      | 1           |
|                 | 5          | 12  | ,42   | ,515               | ,149           | ,09                                             | ,74  | 0      | 1           |
|                 | 6          | 4   | ,25   | ,500               | ,250           | -,55                                            | 1,05 | 0      | 1           |
|                 | Total<br>e | 124 | ,31   | ,466               | ,042           | ,23                                             | ,40  | 0      | 1           |
| 3.F.VISO.T      | 1          | 50  | ,90   | ,303               | ,043           | ,81                                             | ,99  | 0      | 1           |
|                 | 2          | 34  | ,94   | ,239               | ,041           | ,86                                             | 1,02 | 0      | 1           |
|                 | 3          | 13  | ,92   | ,277               | ,077           | ,76                                             | 1,09 | 0      | 1           |
|                 | 4          | 11  | ,91   | ,302               | ,091           | ,71                                             | 1,11 | 0      | 1           |
|                 | 5          | 12  | ,92   | ,289               | ,083           | ,73                                             | 1,10 | 0      | 1           |
|                 | 6          | 4   | ,75   | ,500               | ,250           | -,05                                            | 1,55 | 0      | 1           |

|                 |         |     |      |      |      |      |      |   |   |
|-----------------|---------|-----|------|------|------|------|------|---|---|
|                 | Total e | 124 | ,91  | ,285 | ,026 | ,86  | ,96  | 0 | 1 |
| 4.M.VISO.<br>F. | 1       | 50  | ,96  | ,198 | ,028 | ,90  | 1,02 | 0 | 1 |
|                 | 2       | 34  | 1,00 | ,000 | ,000 | 1,00 | 1,00 | 1 | 1 |
|                 | 3       | 13  | 1,00 | ,000 | ,000 | 1,00 | 1,00 | 1 | 1 |
|                 | 4       | 11  | ,82  | ,405 | ,122 | ,55  | 1,09 | 0 | 1 |
|                 | 5       | 12  | 1,00 | ,000 | ,000 | 1,00 | 1,00 | 1 | 1 |
|                 | 6       | 4   | 1,00 | ,000 | ,000 | 1,00 | 1,00 | 1 | 1 |
|                 | Total e | 124 | ,97  | ,177 | ,016 | ,94  | 1,00 | 0 | 1 |
| 5.F.MASC.<br>F  | 1       | 50  | ,88  | ,328 | ,046 | ,79  | ,97  | 0 | 1 |
|                 | 2       | 34  | ,79  | ,410 | ,070 | ,65  | ,94  | 0 | 1 |
|                 | 3       | 13  | 1,00 | ,000 | ,000 | 1,00 | 1,00 | 1 | 1 |
|                 | 4       | 11  | ,91  | ,302 | ,091 | ,71  | 1,11 | 0 | 1 |
|                 | 5       | 12  | 1,00 | ,000 | ,000 | 1,00 | 1,00 | 1 | 1 |
|                 | 6       | 4   | 1,00 | ,000 | ,000 | 1,00 | 1,00 | 1 | 1 |
|                 | Total e | 124 | ,89  | ,318 | ,029 | ,83  | ,94  | 0 | 1 |
| 6.M.OCC.<br>R.  | 1       | 50  | ,76  | ,431 | ,061 | ,64  | ,88  | 0 | 1 |
|                 | 2       | 34  | ,65  | ,485 | ,083 | ,48  | ,82  | 0 | 1 |
|                 | 3       | 13  | ,54  | ,519 | ,144 | ,22  | ,85  | 0 | 1 |
|                 | 4       | 11  | ,55  | ,522 | ,157 | ,19  | ,90  | 0 | 1 |
|                 | 5       | 12  | ,67  | ,492 | ,142 | ,35  | ,98  | 0 | 1 |
|                 | 6       | 4   | ,00  | ,000 | ,000 | ,00  | ,00  | 0 | 0 |
|                 | Total e | 124 | ,65  | ,478 | ,043 | ,57  | ,74  | 0 | 1 |
| 7.F.NIQ.T.      | 1       | 50  | ,72  | ,454 | ,064 | ,59  | ,85  | 0 | 1 |
|                 | 2       | 34  | ,79  | ,410 | ,070 | ,65  | ,94  | 0 | 1 |
|                 | 3       | 13  | ,69  | ,480 | ,133 | ,40  | ,98  | 0 | 1 |
|                 | 4       | 11  | ,55  | ,522 | ,157 | ,19  | ,90  | 0 | 1 |
|                 | 5       | 12  | ,67  | ,492 | ,142 | ,35  | ,98  | 0 | 1 |
|                 | 6       | 4   | ,75  | ,500 | ,250 | -,05 | 1,55 | 0 | 1 |
|                 | Total e | 124 | ,72  | ,452 | ,041 | ,64  | ,80  | 0 | 1 |
| 8.F.OCC.R<br>.  | 1       | 50  | ,86  | ,351 | ,050 | ,76  | ,96  | 0 | 1 |
|                 | 2       | 34  | ,88  | ,327 | ,056 | ,77  | 1,00 | 0 | 1 |
|                 | 3       | 13  | ,85  | ,376 | ,104 | ,62  | 1,07 | 0 | 1 |
|                 | 4       | 11  | ,73  | ,467 | ,141 | ,41  | 1,04 | 0 | 1 |
|                 | 5       | 12  | 1,00 | ,000 | ,000 | 1,00 | 1,00 | 1 | 1 |
|                 | 6       | 4   | 1,00 | ,000 | ,000 | 1,00 | 1,00 | 1 | 1 |
|                 | Total e | 124 | ,87  | ,337 | ,030 | ,81  | ,93  | 0 | 1 |
| 9.M.MASC.<br>P. | 1       | 50  | ,00  | ,000 | ,000 | ,00  | ,00  | 0 | 0 |
|                 | 2       | 34  | ,03  | ,171 | ,029 | -,03 | ,09  | 0 | 1 |
|                 | 3       | 13  | ,00  | ,000 | ,000 | ,00  | ,00  | 0 | 0 |
|                 | 4       | 11  | ,27  | ,467 | ,141 | -,04 | ,59  | 0 | 1 |

|               |         |     |     |      |      |      |     |   |   |
|---------------|---------|-----|-----|------|------|------|-----|---|---|
|               | 5       | 12  | ,00 | ,000 | ,000 | ,00  | ,00 | 0 | 0 |
|               | 6       | 4   | ,00 | ,000 | ,000 | ,00  | ,00 | 0 | 0 |
|               | Total e | 124 | ,03 | ,177 | ,016 | ,00  | ,06 | 0 | 1 |
| 10.F.NIQ.D G. | 1       | 50  | ,06 | ,240 | ,034 | -,01 | ,13 | 0 | 1 |
|               | 2       | 34  | ,06 | ,239 | ,041 | -,02 | ,14 | 0 | 1 |
|               | 3       | 13  | ,15 | ,376 | ,104 | -,07 | ,38 | 0 | 1 |
|               | 4       | 11  | ,00 | ,000 | ,000 | ,00  | ,00 | 0 | 0 |
|               | 5       | 12  | ,00 | ,000 | ,000 | ,00  | ,00 | 0 | 0 |
|               | 6       | 4   | ,00 | ,000 | ,000 | ,00  | ,00 | 0 | 0 |
|               | Total e | 124 | ,06 | ,232 | ,021 | ,02  | ,10 | 0 | 1 |

## ANOVA

|              |                | Somma dei quadrati | df  | Media quadratica | F     | Sig.        |
|--------------|----------------|--------------------|-----|------------------|-------|-------------|
| 1.F.VISO.R.  | Tra gruppi     | 1,012              | 5   | ,202             | 1,302 | ,268        |
|              | Entro i gruppi | 18,343             | 118 | ,155             |       |             |
|              | Totale         | 19,355             | 123 |                  |       |             |
| 2.M.VISO.P.  | Tra gruppi     | ,576               | 5   | ,115             | ,520  | ,761        |
|              | Entro i gruppi | 26,157             | 118 | ,222             |       |             |
|              | Totale         | 26,734             | 123 |                  |       |             |
| 3.F.VISO.T.  | Tra gruppi     | ,143               | 5   | ,029             | ,342  | ,887        |
|              | Entro i gruppi | 9,881              | 118 | ,084             |       |             |
|              | Totale         | 10,024             | 123 |                  |       |             |
| 4.M.VISO.F.  | Tra gruppi     | ,315               | 5   | ,063             | 2,088 | ,072        |
|              | Entro i gruppi | 3,556              | 118 | ,030             |       |             |
|              | Totale         | 3,871              | 123 |                  |       |             |
| 5.F.MASC.F   | Tra gruppi     | ,671               | 5   | ,134             | 1,349 | ,249        |
|              | Entro i gruppi | 11,748             | 118 | ,100             |       |             |
|              | Totale         | 12,419             | 123 |                  |       |             |
| 6.M.OCC.R.   | Tra gruppi     | 2,579              | 5   | ,516             | 2,386 | <b>,042</b> |
|              | Entro i gruppi | 25,509             | 118 | ,216             |       |             |
|              | Totale         | 28,089             | 123 |                  |       |             |
| 7.F.NIQ.T.   | Tra gruppi     | ,569               | 5   | ,114             | ,547  | ,740        |
|              | Entro i gruppi | 24,552             | 118 | ,208             |       |             |
|              | Totale         | 25,121             | 123 |                  |       |             |
| 8.F.OCC.R.   | Tra gruppi     | ,512               | 5   | ,102             | ,900  | ,484        |
|              | Entro i gruppi | 13,424             | 118 | ,114             |       |             |
|              | Totale         | 13,935             | 123 |                  |       |             |
| 9.M.MASC.P.  | Tra gruppi     | ,719               | 5   | ,144             | 5,379 | <b>,000</b> |
|              | Entro i gruppi | 3,152              | 118 | ,027             |       |             |
|              | Totale         | 3,871              | 123 |                  |       |             |
| 10.F.NIQ.DG. | Tra gruppi     | ,210               | 5   | ,042             | ,776  | ,569        |

|  |                |       |     |      |  |  |
|--|----------------|-------|-----|------|--|--|
|  | Entro i gruppi | 6,395 | 118 | ,054 |  |  |
|  | Totale         | 6,605 | 123 |      |  |  |

A una via

A una via

| Descrittive       |            |     |       |                    |                |                                                    |                     |        |             |
|-------------------|------------|-----|-------|--------------------|----------------|----------------------------------------------------|---------------------|--------|-------------|
|                   |            | N   | Medio | Deviazione<br>std. | Errore<br>std. | 95% di intervallo di<br>confidenza per la<br>media |                     | Minimo | Massim<br>o |
|                   |            |     |       |                    |                | Limite<br>inferiore                                | Limite<br>superiore |        |             |
| 21.F.MASC.<br>T.  | 1          | 50  | ,58   | ,499               | ,071           | ,44                                                | ,72                 | 0      | 1           |
|                   | 2          | 34  | ,62   | ,493               | ,085           | ,45                                                | ,79                 | 0      | 1           |
|                   | 3          | 13  | ,62   | ,506               | ,140           | ,31                                                | ,92                 | 0      | 1           |
|                   | 4          | 11  | ,73   | ,467               | ,141           | ,41                                                | 1,04                | 0      | 1           |
|                   | 5          | 12  | ,75   | ,452               | ,131           | ,46                                                | 1,04                | 0      | 1           |
|                   | 6          | 4   | ,00   | ,000               | ,000           | ,00                                                | ,00                 | 0      | 0           |
|                   | Total<br>e | 124 | ,60   | ,491               | ,044           | ,52                                                | ,69                 | 0      | 1           |
| 22.M.MASC.<br>DG. | 1          | 50  | ,24   | ,431               | ,061           | ,12                                                | ,36                 | 0      | 1           |
|                   | 2          | 34  | ,21   | ,410               | ,070           | ,06                                                | ,35                 | 0      | 1           |
|                   | 3          | 13  | ,31   | ,480               | ,133           | ,02                                                | ,60                 | 0      | 1           |
|                   | 4          | 11  | ,27   | ,467               | ,141           | -,04                                               | ,59                 | 0      | 1           |
|                   | 5          | 12  | ,25   | ,452               | ,131           | -,04                                               | ,54                 | 0      | 1           |
|                   | 6          | 4   | ,50   | ,577               | ,289           | -,42                                               | 1,42                | 0      | 1           |
|                   | Total<br>e | 124 | ,25   | ,435               | ,039           | ,17                                                | ,33                 | 0      | 1           |
| 23.F.MASC.<br>DP. | 1          | 50  | ,52   | ,505               | ,071           | ,38                                                | ,66                 | 0      | 1           |
|                   | 2          | 34  | ,32   | ,475               | ,081           | ,16                                                | ,49                 | 0      | 1           |
|                   | 3          | 13  | ,23   | ,439               | ,122           | -,03                                               | ,50                 | 0      | 1           |
|                   | 4          | 11  | ,09   | ,302               | ,091           | -,11                                               | ,29                 | 0      | 1           |
|                   | 5          | 12  | ,67   | ,492               | ,142           | ,35                                                | ,98                 | 0      | 1           |
|                   | 6          | 4   | ,25   | ,500               | ,250           | -,55                                               | 1,05                | 0      | 1           |
|                   | Total<br>e | 124 | ,40   | ,493               | ,044           | ,32                                                | ,49                 | 0      | 1           |
| 24.F.VISO.F.      | 1          | 50  | ,96   | ,198               | ,028           | ,90                                                | 1,02                | 0      | 1           |
|                   | 2          | 34  | ,94   | ,239               | ,041           | ,86                                                | 1,02                | 0      | 1           |

|                |         |     |      |      |      |      |      |   |   |
|----------------|---------|-----|------|------|------|------|------|---|---|
|                | 3       | 13  | 1,00 | ,000 | ,000 | 1,00 | 1,00 | 1 | 1 |
|                | 4       | 11  | 1,00 | ,000 | ,000 | 1,00 | 1,00 | 1 | 1 |
|                | 5       | 12  | 1,00 | ,000 | ,000 | 1,00 | 1,00 | 1 | 1 |
|                | 6       | 4   | 1,00 | ,000 | ,000 | 1,00 | 1,00 | 1 | 1 |
|                | Total e | 124 | ,97  | ,177 | ,016 | ,94  | 1,00 | 0 | 1 |
| 25.M.VISO.S .  | 1       | 50  | ,96  | ,198 | ,028 | ,90  | 1,02 | 0 | 1 |
|                | 2       | 34  | 1,00 | ,000 | ,000 | 1,00 | 1,00 | 1 | 1 |
|                | 3       | 13  | 1,00 | ,000 | ,000 | 1,00 | 1,00 | 1 | 1 |
|                | 4       | 11  | 1,00 | ,000 | ,000 | 1,00 | 1,00 | 1 | 1 |
|                | 5       | 12  | 1,00 | ,000 | ,000 | 1,00 | 1,00 | 1 | 1 |
|                | 6       | 4   | ,75  | ,500 | ,250 | -,05 | 1,55 | 0 | 1 |
|                | Total e | 124 | ,98  | ,154 | ,014 | ,95  | 1,00 | 0 | 1 |
| 26.F.NIQ.F.    | 1       | 50  | ,96  | ,198 | ,028 | ,90  | 1,02 | 0 | 1 |
|                | 2       | 34  | ,94  | ,239 | ,041 | ,86  | 1,02 | 0 | 1 |
|                | 3       | 13  | 1,00 | ,000 | ,000 | 1,00 | 1,00 | 1 | 1 |
|                | 4       | 11  | 1,00 | ,000 | ,000 | 1,00 | 1,00 | 1 | 1 |
|                | 5       | 12  | 1,00 | ,000 | ,000 | 1,00 | 1,00 | 1 | 1 |
|                | 6       | 4   | 1,00 | ,000 | ,000 | 1,00 | 1,00 | 1 | 1 |
|                | Total e | 124 | ,97  | ,177 | ,016 | ,94  | 1,00 | 0 | 1 |
| 27.F.OCC.T.    | 1       | 50  | ,80  | ,404 | ,057 | ,69  | ,91  | 0 | 1 |
|                | 2       | 34  | ,76  | ,431 | ,074 | ,61  | ,91  | 0 | 1 |
|                | 3       | 13  | 1,00 | ,000 | ,000 | 1,00 | 1,00 | 1 | 1 |
|                | 4       | 11  | ,73  | ,467 | ,141 | ,41  | 1,04 | 0 | 1 |
|                | 5       | 12  | ,75  | ,452 | ,131 | ,46  | 1,04 | 0 | 1 |
|                | 6       | 4   | ,75  | ,500 | ,250 | -,05 | 1,55 | 0 | 1 |
|                | Total e | 124 | ,80  | ,403 | ,036 | ,73  | ,87  | 0 | 1 |
| 28.M.VISO.D P. | 1       | 50  | ,60  | ,495 | ,070 | ,46  | ,74  | 0 | 1 |
|                | 2       | 34  | ,62  | ,493 | ,085 | ,45  | ,79  | 0 | 1 |
|                | 3       | 13  | ,15  | ,376 | ,104 | -,07 | ,38  | 0 | 1 |
|                | 4       | 11  | ,55  | ,522 | ,157 | ,19  | ,90  | 0 | 1 |
|                | 5       | 12  | ,75  | ,452 | ,131 | ,46  | 1,04 | 0 | 1 |
|                | 6       | 4   | ,25  | ,500 | ,250 | -,55 | 1,05 | 0 | 1 |
|                | Total e | 124 | ,56  | ,499 | ,045 | ,47  | ,65  | 0 | 1 |
| 29.F.MASC.S.   | 1       | 50  | ,84  | ,370 | ,052 | ,73  | ,95  | 0 | 1 |
|                | 2       | 34  | ,94  | ,239 | ,041 | ,86  | 1,02 | 0 | 1 |
|                | 3       | 13  | ,85  | ,376 | ,104 | ,62  | 1,07 | 0 | 1 |
|                | 4       | 11  | ,82  | ,405 | ,122 | ,55  | 1,09 | 0 | 1 |
|                | 5       | 12  | 1,00 | ,000 | ,000 | 1,00 | 1,00 | 1 | 1 |
|                | 6       | 4   | 1,00 | ,000 | ,000 | 1,00 | 1,00 | 1 | 1 |
|                | Total e | 124 | ,89  | ,318 | ,029 | ,83  | ,94  | 0 | 1 |

|               |     |     |      |      |      |      |   |   |
|---------------|-----|-----|------|------|------|------|---|---|
| 30.M.OCC.T. 1 | 50  | ,28 | ,454 | ,064 | ,15  | ,41  | 0 | 1 |
| 2             | 34  | ,18 | ,387 | ,066 | ,04  | ,31  | 0 | 1 |
| 3             | 13  | ,54 | ,519 | ,144 | ,22  | ,85  | 0 | 1 |
| 4             | 11  | ,18 | ,405 | ,122 | -,09 | ,45  | 0 | 1 |
| 5             | 12  | ,17 | ,389 | ,112 | -,08 | ,41  | 0 | 1 |
| 6             | 4   | ,25 | ,500 | ,250 | -,55 | 1,05 | 0 | 1 |
| Total e       | 124 | ,26 | ,439 | ,039 | ,18  | ,34  | 0 | 1 |

## ANOVA

|               |                | Somma dei<br>quadrati | df  | Media<br>quadratica | F     | Sig.               |
|---------------|----------------|-----------------------|-----|---------------------|-------|--------------------|
| 21.F.MASC.T.  | Tra gruppi     | 1,919                 | 5   | ,384                | 1,634 | ,156               |
|               | Entro i gruppi | 27,718                | 118 | ,235                |       |                    |
|               | Totale         | 29,637                | 123 |                     |       |                    |
| 22.M.MASC.DG. | Tra gruppi     | ,370                  | 5   | ,074                | ,382  | ,860               |
|               | Entro i gruppi | 22,880                | 118 | ,194                |       |                    |
|               | Totale         | 23,250                | 123 |                     |       |                    |
| 23.F.MASC.DP. | Tra gruppi     | 3,284                 | 5   | ,657                | 2,919 | <b><u>,016</u></b> |
|               | Entro i gruppi | 26,555                | 118 | ,225                |       |                    |
|               | Totale         | 29,839                | 123 |                     |       |                    |
| 24.F.VISO.F.  | Tra gruppi     | ,069                  | 5   | ,014                | ,426  | ,830               |
|               | Entro i gruppi | 3,802                 | 118 | ,032                |       |                    |
|               | Totale         | 3,871                 | 123 |                     |       |                    |
| 25.M.VISO.S.  | Tra gruppi     | ,257                  | 5   | ,051                | 2,275 | <b><u>,051</u></b> |
|               | Entro i gruppi | 2,670                 | 118 | ,023                |       |                    |
|               | Totale         | 2,927                 | 123 |                     |       |                    |
| 26.F.NIQ.F.   | Tra gruppi     | ,069                  | 5   | ,014                | ,426  | ,830               |
|               | Entro i gruppi | 3,802                 | 118 | ,032                |       |                    |
|               | Totale         | 3,871                 | 123 |                     |       |                    |
| 27.F.OCC.T.   | Tra gruppi     | ,660                  | 5   | ,132                | ,807  | ,547               |
|               | Entro i gruppi | 19,299                | 118 | ,164                |       |                    |
|               | Totale         | 19,960                | 123 |                     |       |                    |
| 28.M.VISO.DP. | Tra gruppi     | 3,156                 | 5   | ,631                | 2,713 | <b><u>,023</u></b> |
|               | Entro i gruppi | 27,449                | 118 | ,233                |       |                    |
|               | Totale         | 30,605                | 123 |                     |       |                    |
| 29.F.MASC.S.  | Tra gruppi     | ,488                  | 5   | ,098                | ,966  | ,442               |
|               | Entro i gruppi | 11,931                | 118 | ,101                |       |                    |
|               | Totale         | 12,419                | 123 |                     |       |                    |
| 30.M.OCC.T.   | Tra gruppi     | 1,437                 | 5   | ,287                | 1,520 | ,189               |
|               | Entro i gruppi | 22,305                | 118 | ,189                |       |                    |
|               | Totale         | 23,742                | 123 |                     |       |                    |



| Descrittive       |            |     |       |                    |                |                                                    |                     |        |             |
|-------------------|------------|-----|-------|--------------------|----------------|----------------------------------------------------|---------------------|--------|-------------|
|                   |            | N   | Medio | Deviazione<br>std. | Errore<br>std. | 95% di intervallo di<br>confidenza per la<br>media |                     | Minimo | Massim<br>o |
|                   |            |     |       |                    |                | Limite<br>inferiore                                | Limite<br>superiore |        |             |
| 41.M.OCC.D<br>P.  | 1          | 50  | ,54   | ,503               | ,071           | ,40                                                | ,68                 | 0      | 1           |
|                   | 2          | 34  | ,50   | ,508               | ,087           | ,32                                                | ,68                 | 0      | 1           |
|                   | 3          | 13  | ,38   | ,506               | ,140           | ,08                                                | ,69                 | 0      | 1           |
|                   | 4          | 11  | ,27   | ,467               | ,141           | -,04                                               | ,59                 | 0      | 1           |
|                   | 5          | 12  | ,83   | ,389               | ,112           | ,59                                                | 1,08                | 0      | 1           |
|                   | 6          | 4   | ,50   | ,577               | ,289           | -,42                                               | 1,42                | 0      | 1           |
|                   | Total<br>e | 124 | ,52   | ,502               | ,045           | ,43                                                | ,61                 | 0      | 1           |
| 42.F.NIQ.R.       | 1          | 50  | ,84   | ,370               | ,052           | ,73                                                | ,95                 | 0      | 1           |
|                   | 2          | 34  | ,91   | ,288               | ,049           | ,81                                                | 1,01                | 0      | 1           |
|                   | 3          | 13  | ,92   | ,277               | ,077           | ,76                                                | 1,09                | 0      | 1           |
|                   | 4          | 11  | ,82   | ,405               | ,122           | ,55                                                | 1,09                | 0      | 1           |
|                   | 5          | 12  | ,83   | ,389               | ,112           | ,59                                                | 1,08                | 0      | 1           |
|                   | 6          | 4   | ,75   | ,500               | ,250           | -,05                                               | 1,55                | 0      | 1           |
|                   | Total<br>e | 124 | ,86   | ,345               | ,031           | ,80                                                | ,92                 | 0      | 1           |
| 43.F.OCC.D<br>P.  | 1          | 50  | ,62   | ,490               | ,069           | ,48                                                | ,76                 | 0      | 1           |
|                   | 2          | 34  | ,65   | ,485               | ,083           | ,48                                                | ,82                 | 0      | 1           |
|                   | 3          | 13  | ,38   | ,506               | ,140           | ,08                                                | ,69                 | 0      | 1           |
|                   | 4          | 11  | ,55   | ,522               | ,157           | ,19                                                | ,90                 | 0      | 1           |
|                   | 5          | 12  | ,67   | ,492               | ,142           | ,35                                                | ,98                 | 0      | 1           |
|                   | 6          | 4   | ,50   | ,577               | ,289           | -,42                                               | 1,42                | 0      | 1           |
|                   | Total<br>e | 124 | ,60   | ,493               | ,044           | ,51                                                | ,68                 | 0      | 1           |
| 44.M.OCC.S<br>.   | 1          | 50  | ,98   | ,141               | ,020           | ,94                                                | 1,02                | 0      | 1           |
|                   | 2          | 34  | 1,00  | ,000               | ,000           | 1,00                                               | 1,00                | 1      | 1           |
|                   | 3          | 13  | ,92   | ,277               | ,077           | ,76                                                | 1,09                | 0      | 1           |
|                   | 4          | 11  | ,91   | ,302               | ,091           | ,71                                                | 1,11                | 0      | 1           |
|                   | 5          | 12  | 1,00  | ,000               | ,000           | 1,00                                               | 1,00                | 1      | 1           |
|                   | 6          | 4   | 1,00  | ,000               | ,000           | 1,00                                               | 1,00                | 1      | 1           |
|                   | Total<br>e | 124 | ,98   | ,154               | ,014           | ,95                                                | 1,00                | 0      | 1           |
| 45.F.VISO.D<br>G. | 1          | 50  | ,80   | ,404               | ,057           | ,69                                                | ,91                 | 0      | 1           |
|                   | 2          | 34  | ,79   | ,410               | ,070           | ,65                                                | ,94                 | 0      | 1           |

|                   |            |     |     |      |      |      |      |   |   |
|-------------------|------------|-----|-----|------|------|------|------|---|---|
|                   | 3          | 13  | ,54 | ,519 | ,144 | ,22  | ,85  | 0 | 1 |
|                   | 4          | 11  | ,64 | ,505 | ,152 | ,30  | ,98  | 0 | 1 |
|                   | 5          | 12  | ,92 | ,289 | ,083 | ,73  | 1,10 | 0 | 1 |
|                   | 6          | 4   | ,75 | ,500 | ,250 | -,05 | 1,55 | 0 | 1 |
| 46.M.OCC.P<br>.   | Total<br>e | 124 | ,77 | ,425 | ,038 | ,69  | ,84  | 0 | 1 |
|                   | 1          | 50  | ,34 | ,479 | ,068 | ,20  | ,48  | 0 | 1 |
|                   | 2          | 34  | ,26 | ,448 | ,077 | ,11  | ,42  | 0 | 1 |
|                   | 3          | 13  | ,46 | ,519 | ,144 | ,15  | ,78  | 0 | 1 |
|                   | 4          | 11  | ,36 | ,505 | ,152 | ,02  | ,70  | 0 | 1 |
|                   | 5          | 12  | ,50 | ,522 | ,151 | ,17  | ,83  | 0 | 1 |
|                   | 6          | 4   | ,25 | ,500 | ,250 | -,55 | 1,05 | 0 | 1 |
|                   | Total<br>e | 124 | ,35 | ,478 | ,043 | ,26  | ,43  | 0 | 1 |
| 47.F.NIQ.DP<br>.  | 1          | 50  | ,42 | ,499 | ,071 | ,28  | ,56  | 0 | 1 |
|                   | 2          | 34  | ,26 | ,448 | ,077 | ,11  | ,42  | 0 | 1 |
|                   | 3          | 13  | ,08 | ,277 | ,077 | -,09 | ,24  | 0 | 1 |
|                   | 4          | 11  | ,45 | ,522 | ,157 | ,10  | ,81  | 0 | 1 |
|                   | 5          | 12  | ,50 | ,522 | ,151 | ,17  | ,83  | 0 | 1 |
|                   | 6          | 4   | ,25 | ,500 | ,250 | -,55 | 1,05 | 0 | 1 |
|                   | Total<br>e | 124 | ,35 | ,478 | ,043 | ,26  | ,43  | 0 | 1 |
|                   |            |     |     |      |      |      |      |   |   |
| 48.F.MASC.<br>DG. | 1          | 50  | ,16 | ,370 | ,052 | ,05  | ,27  | 0 | 1 |
|                   | 2          | 34  | ,18 | ,387 | ,066 | ,04  | ,31  | 0 | 1 |
|                   | 3          | 13  | ,23 | ,439 | ,122 | -,03 | ,50  | 0 | 1 |
|                   | 4          | 11  | ,64 | ,505 | ,152 | ,30  | ,98  | 0 | 1 |
|                   | 5          | 12  | ,33 | ,492 | ,142 | ,02  | ,65  | 0 | 1 |
|                   | 6          | 4   | ,25 | ,500 | ,250 | -,55 | 1,05 | 0 | 1 |
|                   | Total<br>e | 124 | ,23 | ,425 | ,038 | ,16  | ,31  | 0 | 1 |
|                   |            |     |     |      |      |      |      |   |   |
| 49.M.MASC.<br>DP. | 1          | 50  | ,32 | ,471 | ,067 | ,19  | ,45  | 0 | 1 |
|                   | 2          | 34  | ,12 | ,327 | ,056 | ,00  | ,23  | 0 | 1 |
|                   | 3          | 13  | ,15 | ,376 | ,104 | -,07 | ,38  | 0 | 1 |
|                   | 4          | 11  | ,27 | ,467 | ,141 | -,04 | ,59  | 0 | 1 |
|                   | 5          | 12  | ,25 | ,452 | ,131 | -,04 | ,54  | 0 | 1 |
|                   | 6          | 4   | ,00 | ,000 | ,000 | ,00  | ,00  | 0 | 0 |
|                   | Total<br>e | 124 | ,23 | ,420 | ,038 | ,15  | ,30  | 0 | 1 |
|                   |            |     |     |      |      |      |      |   |   |

## ANOVA

|              |                | Somma dei<br>quadrati | df  | Media<br>quadratica | F     | Sig. |
|--------------|----------------|-----------------------|-----|---------------------|-------|------|
| 41.M.OCC.DP. | Tra gruppi     | 2,122                 | 5   | ,424                | 1,736 | ,132 |
|              | Entro i gruppi | 28,845                | 118 | ,244                |       |      |
|              | Totale         | 30,968                | 123 |                     |       |      |

|               |                |        |     |      |       |                    |
|---------------|----------------|--------|-----|------|-------|--------------------|
| 42.F.NIQ.R.   | Tra gruppi     | ,238   | 5   | ,048 | ,389  | ,855               |
|               | Entro i gruppi | 14,431 | 118 | ,122 |       |                    |
|               | Totale         | 14,669 | 123 |      |       |                    |
| 43.F.OCC.DP.  | Tra gruppi     | ,823   | 5   | ,165 | ,670  | ,647               |
|               | Entro i gruppi | 29,016 | 118 | ,246 |       |                    |
|               | Totale         | 29,839 | 123 |      |       |                    |
| 44.M.OCC.S.   | Tra gruppi     | ,115   | 5   | ,023 | ,967  | ,441               |
|               | Entro i gruppi | 2,812  | 118 | ,024 |       |                    |
|               | Totale         | 2,927  | 123 |      |       |                    |
| 45.F.VISO.DG. | Tra gruppi     | 1,216  | 5   | ,243 | 1,366 | ,242               |
|               | Entro i gruppi | 21,002 | 118 | ,178 |       |                    |
|               | Totale         | 22,218 | 123 |      |       |                    |
| 46.M.OCC.P.   | Tra gruppi     | ,725   | 5   | ,145 | ,625  | ,681               |
|               | Entro i gruppi | 27,364 | 118 | ,232 |       |                    |
|               | Totale         | 28,089 | 123 |      |       |                    |
| 47.F.NIQ.DP.  | Tra gruppi     | 1,891  | 5   | ,378 | 1,703 | ,139               |
|               | Entro i gruppi | 26,198 | 118 | ,222 |       |                    |
|               | Totale         | 28,089 | 123 |      |       |                    |
| 48.F.MASC.DG. | Tra gruppi     | 2,287  | 5   | ,457 | 2,708 | <b><u>,024</u></b> |
|               | Entro i gruppi | 19,931 | 118 | ,169 |       |                    |
|               | Totale         | 22,218 | 123 |      |       |                    |
| 49.M.MASC.DP. | Tra gruppi     | 1,144  | 5   | ,229 | 1,315 | ,262               |
|               | Entro i gruppi | 20,534 | 118 | ,174 |       |                    |
|               | Totale         | 21,677 | 123 |      |       |                    |

Test t

| Statistiche gruppo |       |    |        |                 |                             |
|--------------------|-------|----|--------|-----------------|-----------------------------|
|                    | Sesso | N  | Media  | Deviazione std. | Errore standard della media |
| EI                 | 1     | 71 | 3,6893 | ,28319          | ,03361                      |
|                    | 2     | 53 | 3,6026 | ,32781          | ,04503                      |

Test campioni indipendenti

| Test di Levene per l'eguaglianza delle varianze |       | Test t per l'eguaglianza delle medie |    |                    |                        |
|-------------------------------------------------|-------|--------------------------------------|----|--------------------|------------------------|
| F                                               | Sign. | t                                    | gl | Sign. (a due code) | Differenza della media |

|    |                              |      |      |       |         |      |        |
|----|------------------------------|------|------|-------|---------|------|--------|
| EI | Varianze uguali presunte     | ,868 | ,353 | 1,575 | 122     | ,118 | ,08666 |
|    | Varianze uguali non presunte |      |      | 1,542 | 102,455 | ,126 | ,08666 |

Test campioni indipendenti

|    |                              | Test t per l'eguaglianza delle medie |  | Intervallo di confidenza della differenza di 95% |           |
|----|------------------------------|--------------------------------------|--|--------------------------------------------------|-----------|
|    |                              | Differenza errore std.               |  | Inferiore                                        | Superiore |
| EI | Varianze uguali presunte     | ,05501                               |  | -,02223                                          | ,19555    |
|    | Varianze uguali non presunte | ,05619                               |  | -,02479                                          | ,19810    |

Dimensioni effetto campioni indipendenti

|    |                      | Standardizzator e <sup>a</sup> | Stima del punto | Intervallo di confidenza 95% |           |
|----|----------------------|--------------------------------|-----------------|------------------------------|-----------|
|    |                      |                                |                 | Inferiore                    | Superiore |
| EI | D di Cohen           | ,30301                         | ,286            | -,072                        | ,643      |
|    | Correzione di Hedges | ,30489                         | ,284            | -,072                        | ,639      |
|    | Delta di Glass       | ,32781                         | ,264            | -,096                        | ,622      |

a. Il denominatore utilizzato per stimare le dimensioni dell'effetto.  
D di Cohen utilizza la deviazione standard raggruppata.  
La correzione Hedges utilizza la deviazione standard raggruppata, più un fattore di correzione.  
Il delta di Glass utilizza la deviazione standard del campione del gruppo di controllo.

A una via

Descrittive

| EI     |  | 95% di intervallo di confidenza per la media |               |                 |             |                  |                  |                |
|--------|--|----------------------------------------------|---------------|-----------------|-------------|------------------|------------------|----------------|
|        |  | N                                            | Medio         | Deviazione std. | Errore std. | Limite inferiore | Limite superiore | Minimo Massimo |
| 1      |  | 6                                            | <b>3,9596</b> | ,35940          | ,14673      | 3,5824           | 4,3368           | 3,64 4,64      |
| 2      |  | 57                                           | 3,6130        | ,31818          | ,04214      | 3,5285           | 3,6974           | 3,03 4,76      |
| 3      |  | 26                                           | 3,6166        | ,22692          | ,04450      | 3,5249           | 3,7082           | 3,15 4,03      |
| 4      |  | 35                                           | 3,6900        | ,30143          | ,05095      | 3,5865           | 3,7936           | 3,12 4,24      |
| Totale |  | 124                                          | 3,6522        | ,30483          | ,02737      | 3,5981           | 3,7064           | 3,03 4,76      |

ANOVA

EI

|                | Somma dei<br>quadrati | df  | Media<br>quadratica | F     | Sig.        |
|----------------|-----------------------|-----|---------------------|-------|-------------|
| Tra gruppi     | ,738                  | 3   | ,246                | 2,760 | <b>,045</b> |
| Entro i gruppi | 10,692                | 120 | ,089                |       |             |
| Totale         | 11,430                | 123 |                     |       |             |

A una via

Descrittive

EI

|        | N   | Medio  | Deviazione<br>std. | Errore std. | 95% di intervallo di<br>confidenza per la media |                     | Minimo | Massimo |
|--------|-----|--------|--------------------|-------------|-------------------------------------------------|---------------------|--------|---------|
|        |     |        |                    |             | Limite<br>inferiore                             | Limite<br>superiore |        |         |
| 1      | 50  | 3,5855 | ,30723             | ,04345      | 3,4981                                          | 3,6728              | 3,03   | 4,64    |
| 2      | 34  | 3,6774 | ,29932             | ,05133      | 3,5729                                          | 3,7818              | 3,03   | 4,27    |
| 3      | 13  | 3,7389 | ,31040             | ,08609      | 3,5514                                          | 3,9265              | 3,12   | 4,21    |
| 4      | 11  | 3,7328 | ,37356             | ,11263      | 3,4818                                          | 3,9837              | 3,45   | 4,76    |
| 5      | 12  | 3,7348 | ,22273             | ,06430      | 3,5933                                          | 3,8764              | 3,36   | 4,06    |
| 6      | 4   | 3,5227 | ,25034             | ,12517      | 3,1244                                          | 3,9211              | 3,21   | 3,82    |
| Totale | 124 | 3,6522 | ,30483             | ,02737      | 3,5981                                          | 3,7064              | 3,03   | 4,76    |

ANOVA

EI

|                | Somma dei<br>quadrati | df  | Media<br>quadratica | F     | Sig. |
|----------------|-----------------------|-----|---------------------|-------|------|
| Tra gruppi     | ,563                  | 5   | ,113                | 1,222 | ,303 |
| Entro i gruppi | 10,867                | 118 | ,092                |       |      |
| Totale         | 11,430                | 123 |                     |       |      |

```
DATASET ACTIVATE Dataset0.  
DESCRIPTIVES VARIABLES=EI  
  /STATISTICS=MEAN STDDEV MIN MAX.
```

Descrittive

Statistiche descrittive

|                                  | N   | Minimo | Massimo | Media  | Deviazione std. |
|----------------------------------|-----|--------|---------|--------|-----------------|
| EI                               | 124 | 3,03   | 4,76    | 3,6522 | ,30483          |
| Numero di casi validi (listwise) | 124 |        |         |        |                 |

Esplora

Riepilogo elaborazione casi

|    |     | Casi        |   |             |     |             |  |
|----|-----|-------------|---|-------------|-----|-------------|--|
|    |     | Valido      |   | Mancante    |     | Totale      |  |
|    | N   | Percentuale | N | Percentuale | N   | Percentuale |  |
| EI | 124 | 100,0%      | 0 | 0,0%        | 124 | 100,0%      |  |

Percentili

|                              |    | Percentili |        |        |        |        |        |        |
|------------------------------|----|------------|--------|--------|--------|--------|--------|--------|
|                              |    | 5          | 10     | 25     | 50     | 75     | 90     | 95     |
| Media pesata (definizione 1) | EI | 3,1515     | 3,2424 | 3,4318 | 3,6667 | 3,8409 | 4,0152 | 4,1742 |
| Cardini di Tukey             | EI |            |        | 3,4394 | 3,6667 | 3,8333 |        |        |

Frequenze

Statistiche

|        |          |    |
|--------|----------|----|
| Elperc |          |    |
| N      | Valido   | 59 |
|        | Mancante | 65 |

Elperc

|          |         | Frequenza | Percentuale | Percentuale<br>valida | Percentuale<br>cumulativa |
|----------|---------|-----------|-------------|-----------------------|---------------------------|
| Valido   | 1       | 28        | 22,6        | 47,5                  | 47,5                      |
|          | 2       | 31        | 25,0        | 52,5                  | 100,0                     |
|          | Totale  | 59        | 47,6        | 100,0                 |                           |
| Mancante | Sistema | 65        | 52,4        |                       |                           |
| Totale   |         | 124       | 100,0       |                       |                           |

Test t

### Statistiche gruppo

|              | EI | Per | Basso | Alto | N  | Media | Deviazione std. | Errore standard<br>della media |
|--------------|----|-----|-------|------|----|-------|-----------------|--------------------------------|
| 1.F.VISO.R.  | 1  |     |       |      | 31 | ,77   | ,425            | ,076                           |
|              | 2  |     |       |      | 31 | ,77   | ,425            | ,076                           |
| 2.M.VISO.P.  | 1  |     |       |      | 31 | ,26   | ,445            | ,080                           |
|              | 2  |     |       |      | 31 | ,23   | ,425            | ,076                           |
| 3.F.VISO.T.  | 1  |     |       |      | 31 | ,87   | ,341            | ,061                           |
|              | 2  |     |       |      | 31 | ,94   | ,250            | ,045                           |
| 4.M.VISO.F.  | 1  |     |       |      | 31 | ,97   | ,180            | ,032                           |
|              | 2  |     |       |      | 31 | ,97   | ,180            | ,032                           |
| 5.F.MASC.F   | 1  |     |       |      | 31 | ,87   | ,341            | ,061                           |
|              | 2  |     |       |      | 31 | ,84   | ,374            | ,067                           |
| 6.M.OCC.R.   | 1  |     |       |      | 31 | ,61   | ,495            | ,089                           |
|              | 2  |     |       |      | 31 | ,65   | ,486            | ,087                           |
| 7.F.NIQ.T.   | 1  |     |       |      | 31 | ,74   | ,445            | ,080                           |
|              | 2  |     |       |      | 31 | ,61   | ,495            | ,089                           |
| 8.F.OCC.R.   | 1  |     |       |      | 31 | ,84   | ,374            | ,067                           |
|              | 2  |     |       |      | 31 | ,87   | ,341            | ,061                           |
| 9.M.MASC.P.  | 1  |     |       |      | 31 | ,00   | ,000            | ,000                           |
|              | 2  |     |       |      | 31 | ,03   | ,180            | ,032                           |
| 10.F.NIQ.DG. | 1  |     |       |      | 31 | ,06   | ,250            | ,045                           |
|              | 2  |     |       |      | 31 | ,10   | ,301            | ,054                           |
| 11.M.MASC.F  | 1  |     |       |      | 31 | ,84   | ,374            | ,067                           |
|              | 2  |     |       |      | 31 | 1,00  | ,000            | ,000                           |
| 12.F.VISO.S. | 1  |     |       |      | 31 | ,94   | ,250            | ,045                           |
|              | 2  |     |       |      | 31 | ,90   | ,301            | ,054                           |
| 13.M.VISO.T. | 1  |     |       |      | 31 | ,39   | ,495            | ,089                           |
|              | 2  |     |       |      | 31 | ,13   | ,341            | ,061                           |
| 14.F.OCC.P.  | 1  |     |       |      | 31 | ,06   | ,250            | ,045                           |
|              | 2  |     |       |      | 31 | ,26   | ,445            | ,080                           |
| 15.M.MASC.S  | 1  |     |       |      | 31 | ,90   | ,301            | ,054                           |

|               |   |  |    |      |                   |      |
|---------------|---|--|----|------|-------------------|------|
|               | 2 |  | 31 | ,77  | ,425              | ,076 |
| 16.M.OCC.DG   | 1 |  | 31 | ,58  | ,502              | ,090 |
|               | 2 |  | 31 | ,65  | ,486              | ,087 |
| 17.F.MASC.R.  | 1 |  | 31 | ,81  | ,402              | ,072 |
|               | 2 |  | 31 | ,81  | ,402              | ,072 |
| 18.M.MASC.T   | 1 |  | 31 | ,26  | ,445              | ,080 |
|               | 2 |  | 31 | ,13  | ,341              | ,061 |
| 19.F.VISO.DP  | 1 |  | 31 | ,55  | ,506              | ,091 |
|               | 2 |  | 31 | ,65  | ,486              | ,087 |
| 20.M.OCC.F.   | 1 |  | 31 | 1,00 | ,000 <sup>a</sup> | ,000 |
|               | 2 |  | 31 | 1,00 | ,000 <sup>a</sup> | ,000 |
| 21.F.MASC.T.  | 1 |  | 31 | ,58  | ,502              | ,090 |
|               | 2 |  | 31 | ,61  | ,495              | ,089 |
| 22.M.MASC.DG. | 1 |  | 31 | ,35  | ,486              | ,087 |
|               | 2 |  | 31 | ,19  | ,402              | ,072 |
| 23.F.MASC.DP. | 1 |  | 31 | ,42  | ,502              | ,090 |
|               | 2 |  | 31 | ,29  | ,461              | ,083 |
| 24.F.VISO.F.  | 1 |  | 31 | ,97  | ,180              | ,032 |
|               | 2 |  | 31 | ,94  | ,250              | ,045 |
| 25.M.VISO.S.  | 1 |  | 31 | ,97  | ,180              | ,032 |
|               | 2 |  | 31 | 1,00 | ,000              | ,000 |
| 26.F.NIQ.F.   | 1 |  | 31 | ,94  | ,250              | ,045 |
|               | 2 |  | 31 | 1,00 | ,000              | ,000 |
| 27.F.OCC.T.   | 1 |  | 31 | ,81  | ,402              | ,072 |
|               | 2 |  | 31 | ,74  | ,445              | ,080 |
| 28.M.VISO.DP. | 1 |  | 31 | ,58  | ,502              | ,090 |
|               | 2 |  | 31 | ,52  | ,508              | ,091 |
| 29.F.MASC.S.  | 1 |  | 31 | ,90  | ,301              | ,054 |
|               | 2 |  | 31 | ,90  | ,301              | ,054 |
| 30.M.OCC.T.   | 1 |  | 31 | ,19  | ,402              | ,072 |
|               | 2 |  | 31 | ,23  | ,425              | ,076 |
| 31.F.VISO.P.  | 1 |  | 31 | ,74  | ,445              | ,080 |
|               | 2 |  | 31 | ,68  | ,475              | ,085 |
| 32.M.MASC.R   | 1 |  | 31 | ,81  | ,402              | ,072 |
|               | 2 |  | 31 | ,90  | ,301              | ,054 |
| 33.F.OCC.F.   | 1 |  | 31 | ,94  | ,250              | ,045 |
|               | 2 |  | 31 | ,97  | ,180              | ,032 |
| 34.F.NIQ.P.   | 1 |  | 31 | ,48  | ,508              | ,091 |
|               | 2 |  | 31 | ,61  | ,495              | ,089 |
| 35.F.OCC.S.   | 1 |  | 31 | ,74  | ,445              | ,080 |
|               | 2 |  | 31 | ,94  | ,250              | ,045 |
| 36.M.VISO.DG  | 1 |  | 31 | ,84  | ,374              | ,067 |
|               | 2 |  | 31 | ,65  | ,486              | ,087 |
| 37.F.NIQ.S.   | 1 |  | 31 | ,71  | ,461              | ,083 |
|               | 2 |  | 31 | ,58  | ,502              | ,090 |
| 38.F.OCC.DG.  | 1 |  | 31 | ,77  | ,425              | ,076 |



|               |   |  |    |      |                   |      |
|---------------|---|--|----|------|-------------------|------|
|               | 2 |  | 31 | ,77  | ,425              | ,076 |
| 39.M.VISO.R.  | 1 |  | 31 | ,55  | ,506              | ,091 |
|               | 2 |  | 31 | ,55  | ,506              | ,091 |
| 40.F.MASC.P.  | 1 |  | 31 | ,52  | ,508              | ,091 |
|               | 2 |  | 31 | ,68  | ,475              | ,085 |
| 41.M.OCC.DP.  | 1 |  | 31 | ,48  | ,508              | ,091 |
|               | 2 |  | 31 | ,42  | ,502              | ,090 |
| 42.F.NIQ.R.   | 1 |  | 31 | ,87  | ,341              | ,061 |
|               | 2 |  | 31 | ,77  | ,425              | ,076 |
| 43.F.OCC.DP.  | 1 |  | 31 | ,61  | ,495              | ,089 |
|               | 2 |  | 31 | ,58  | ,502              | ,090 |
| 44.M.OCC.S.   | 1 |  | 31 | 1,00 | ,000 <sup>a</sup> | ,000 |
|               | 2 |  | 31 | 1,00 | ,000 <sup>a</sup> | ,000 |
| 45.F.VISO.DG. | 1 |  | 31 | ,81  | ,402              | ,072 |
|               | 2 |  | 31 | ,71  | ,461              | ,083 |
| 46.M.OCC.P.   | 1 |  | 31 | ,29  | ,461              | ,083 |
|               | 2 |  | 31 | ,29  | ,461              | ,083 |
| 47.F.NIQ.DP.  | 1 |  | 31 | ,32  | ,475              | ,085 |
|               | 2 |  | 31 | ,26  | ,445              | ,080 |
| 48.F.MASC.DG. | 1 |  | 31 | ,23  | ,425              | ,076 |
|               | 2 |  | 31 | ,26  | ,445              | ,080 |
| 49.M.MASC.DP. | 1 |  | 31 | ,23  | ,425              | ,076 |
|               | 2 |  | 31 | ,10  | ,301              | ,054 |

a. Non è possibile calcolare t perché le deviazioni standard di entrambi i gruppi sono 0.

## Test campioni indipendenti

Test di Levene  
per l'eguaglianza  
delle varianze

Test t per l'eguaglianza delle medie

|                 |                                    | Test di Levene<br>per l'eguaglianza<br>delle varianze |       | Test t per l'eguaglianza delle medie |            |                          |                               |                                  |                                                        |               |
|-----------------|------------------------------------|-------------------------------------------------------|-------|--------------------------------------|------------|--------------------------|-------------------------------|----------------------------------|--------------------------------------------------------|---------------|
|                 |                                    | F                                                     | Sign. | t                                    | gl         | Sign. (a<br>due<br>code) | Differen<br>za della<br>media | Differen<br>za<br>errore<br>std. | Intervallo di<br>confidenza della<br>differenza di 95% |               |
|                 |                                    |                                                       |       |                                      |            |                          |                               |                                  | Inferio<br>re                                          | Superio<br>re |
| 1.F.VISO<br>.R. | Varianze<br>uguali<br>presunte     | ,000                                                  | 1,000 | ,000                                 | 60         | 1,000                    | ,000                          | ,108                             | -,216                                                  | ,216          |
|                 | Varianze<br>uguali non<br>presunte |                                                       |       | ,000                                 | 60,0<br>00 | 1,000                    | ,000                          | ,108                             | -,216                                                  | ,216          |
| 2.M.VIS<br>O.P. | Varianze<br>uguali<br>presunte     | ,342                                                  | ,561  | ,292                                 | 60         | ,771                     | ,032                          | ,110                             | -,189                                                  | ,253          |

|                 |                                    |       |       |                |            |       |       |      |       |      |
|-----------------|------------------------------------|-------|-------|----------------|------------|-------|-------|------|-------|------|
|                 | Varianze<br>uguali non<br>presunte |       |       | ,292           | 59,8<br>76 | ,771  | ,032  | ,110 | -,189 | ,253 |
| 3.F.VISO<br>.T. | Varianze<br>uguali<br>presunte     | 3,018 | ,087  | -,850          | 60         | ,399  | -,065 | ,076 | -,216 | ,087 |
|                 | Varianze<br>uguali non<br>presunte |       |       | -,850          | 55,0<br>09 | ,399  | -,065 | ,076 | -,217 | ,088 |
| 4.M.VIS<br>O.F. | Varianze<br>uguali<br>presunte     | ,000  | 1,000 | ,000           | 60         | 1,000 | ,000  | ,046 | -,091 | ,091 |
|                 | Varianze<br>uguali non<br>presunte |       |       | ,000           | 60,0<br>00 | 1,000 | ,000  | ,046 | -,091 | ,091 |
| 5.F.MAS<br>C.F  | Varianze<br>uguali<br>presunte     | ,507  | ,479  | ,355           | 60         | ,724  | ,032  | ,091 | -,149 | ,214 |
|                 | Varianze<br>uguali non<br>presunte |       |       | ,355           | 59,4<br>92 | ,724  | ,032  | ,091 | -,150 | ,214 |
| 6.M.OCC<br>.R.  | Varianze<br>uguali<br>presunte     | ,265  | ,609  | -,259          | 60         | ,797  | -,032 | ,125 | -,282 | ,217 |
|                 | Varianze<br>uguali non<br>presunte |       |       | -,259          | 59,9<br>81 | ,797  | -,032 | ,125 | -,282 | ,217 |
| 7.F.NIQ.<br>T.  | Varianze<br>uguali<br>presunte     | 4,419 | ,040  | 1,07<br>9      | 60         | ,285  | ,129  | ,120 | -,110 | ,368 |
|                 | Varianze<br>uguali non<br>presunte |       |       | 1,07<br>9      | 59,3<br>23 | ,285  | ,129  | ,120 | -,110 | ,368 |
| 8.F.OCC.<br>R.  | Varianze<br>uguali<br>presunte     | ,507  | ,479  | -,355          | 60         | ,724  | -,032 | ,091 | -,214 | ,149 |
|                 | Varianze<br>uguali non<br>presunte |       |       | -,355          | 59,4<br>92 | ,724  | -,032 | ,091 | -,214 | ,150 |
| 9.M.MAS<br>C.P. | Varianze<br>uguali<br>presunte     | 4,281 | ,043  | -<br>1,00<br>0 | 60         | ,321  | -,032 | ,032 | -,097 | ,032 |
|                 | Varianze<br>uguali non<br>presunte |       |       | -<br>1,00<br>0 | 30,0<br>00 | ,325  | -,032 | ,032 | -,098 | ,034 |

|                  |                                    |        |       |                |            |             |       |      |       |       |
|------------------|------------------------------------|--------|-------|----------------|------------|-------------|-------|------|-------|-------|
| 10.F.NIQ<br>.DG. | Varianze<br>uguali<br>presunte     | ,856   | ,359  | -460           | 60         | ,647        | -,032 | ,070 | -,173 | ,108  |
|                  | Varianze<br>uguali non<br>presunte |        |       | -460           | 58,0<br>54 | ,647        | -,032 | ,070 | -,173 | ,108  |
| 11.M.MA<br>SC.F  | Varianze<br>uguali<br>presunte     | 35,374 | ,000  | -<br>2,40<br>2 | 60         | <u>.019</u> | -,161 | ,067 | -,296 | -,027 |
|                  | Varianze<br>uguali non<br>presunte |        |       | -<br>2,40<br>2 | 30,0<br>00 | ,023        | -,161 | ,067 | -,298 | -,024 |
| 12.F.VIS<br>O.S. | Varianze<br>uguali<br>presunte     | ,856   | ,359  | ,460           | 60         | ,647        | ,032  | ,070 | -,108 | ,173  |
|                  | Varianze<br>uguali non<br>presunte |        |       | ,460           | 58,0<br>54 | ,647        | ,032  | ,070 | -,108 | ,173  |
| 13.M.VIS<br>O.T. | Varianze<br>uguali<br>presunte     | 25,299 | ,000  | 2,39<br>0      | 60         | <u>.020</u> | ,258  | ,108 | ,042  | ,474  |
|                  | Varianze<br>uguali non<br>presunte |        |       | 2,39<br>0      | 53,2<br>13 | ,020        | ,258  | ,108 | ,042  | ,475  |
| 14.F.OC<br>C.P.  | Varianze<br>uguali<br>presunte     | 22,766 | ,000  | -<br>2,11<br>3 | 60         | <u>.039</u> | -,194 | ,092 | -,377 | -,010 |
|                  | Varianze<br>uguali non<br>presunte |        |       | -<br>2,11<br>3 | 47,2<br>04 | ,040        | -,194 | ,092 | -,378 | -,009 |
| 15.M.MA<br>SC.S  | Varianze<br>uguali<br>presunte     | 8,379  | ,005  | 1,38<br>0      | 60         | ,173        | ,129  | ,093 | -,058 | ,316  |
|                  | Varianze<br>uguali non<br>presunte |        |       | 1,38<br>0      | 54,0<br>00 | ,173        | ,129  | ,093 | -,058 | ,316  |
| 16.M.OC<br>C.DG  | Varianze<br>uguali<br>presunte     | ,994   | ,323  | -,514          | 60         | ,609        | -,065 | ,125 | -,316 | ,186  |
|                  | Varianze<br>uguali non<br>presunte |        |       | -,514          | 59,9<br>43 | ,609        | -,065 | ,125 | -,316 | ,187  |
| 17.F.MA<br>SC.R. | Varianze<br>uguali<br>presunte     | ,000   | 1,000 | ,000           | 60         | 1,000       | ,000  | ,102 | -,204 | ,204  |

|                   |                                    |       |      |                |            |       |       |      |       |      |
|-------------------|------------------------------------|-------|------|----------------|------------|-------|-------|------|-------|------|
|                   | Varianze<br>uguali non<br>presunte |       |      | ,000           | 60,0<br>00 | 1,000 | ,000  | ,102 | -,204 | ,204 |
| 18.M.MA<br>SC.T   | Varianze<br>uguali<br>presunte     | 7,034 | ,010 | 1,28<br>2      | 60         | ,205  | ,129  | ,101 | -,072 | ,330 |
|                   | Varianze<br>uguali non<br>presunte |       |      | 1,28<br>2      | 56,1<br>93 | ,205  | ,129  | ,101 | -,073 | ,331 |
| 19.F.VIS<br>O.DP  | Varianze<br>uguali<br>presunte     | 1,948 | ,168 | -,768          | 60         | ,446  | -,097 | ,126 | -,349 | ,155 |
|                   | Varianze<br>uguali non<br>presunte |       |      | -,768          | 59,9<br>07 | ,446  | -,097 | ,126 | -,349 | ,155 |
| 21.F.MA<br>SC.T.  | Varianze<br>uguali<br>presunte     | ,254  | ,616 | -,255          | 60         | ,800  | -,032 | ,127 | -,285 | ,221 |
|                   | Varianze<br>uguali non<br>presunte |       |      | -,255          | 59,9<br>90 | ,800  | -,032 | ,127 | -,285 | ,221 |
| 22.M.MA<br>SC.DG. | Varianze<br>uguali<br>presunte     | 8,170 | ,006 | 1,42<br>4      | 60         | ,160  | ,161  | ,113 | -,065 | ,388 |
|                   | Varianze<br>uguali non<br>presunte |       |      | 1,42<br>4      | 57,9<br>27 | ,160  | ,161  | ,113 | -,065 | ,388 |
| 23.F.MA<br>SC.DP. | Varianze<br>uguali<br>presunte     | 3,956 | ,051 | 1,05<br>4      | 60         | ,296  | ,129  | ,122 | -,116 | ,374 |
|                   | Varianze<br>uguali non<br>presunte |       |      | 1,05<br>4      | 59,5<br>86 | ,296  | ,129  | ,122 | -,116 | ,374 |
| 24.F.VIS<br>O.F.  | Varianze<br>uguali<br>presunte     | 1,394 | ,242 | ,584           | 60         | ,561  | ,032  | ,055 | -,078 | ,143 |
|                   | Varianze<br>uguali non<br>presunte |       |      | ,584           | 54,4<br>84 | ,562  | ,032  | ,055 | -,078 | ,143 |
| 25.M.VIS<br>O.S.  | Varianze<br>uguali<br>presunte     | 4,281 | ,043 | -<br>1,00<br>0 | 60         | ,321  | -,032 | ,032 | -,097 | ,032 |
|                   | Varianze<br>uguali non<br>presunte |       |      | -<br>1,00<br>0 | 30,0<br>00 | ,325  | -,032 | ,032 | -,098 | ,034 |

|                   |                                    |       |       |                |            |       |       |      |       |      |
|-------------------|------------------------------------|-------|-------|----------------|------------|-------|-------|------|-------|------|
| 26.F.NIQ<br>.F.   | Varianze<br>uguali<br>presunte     | 9,547 | ,003  | -<br>1,43<br>8 | 60         | ,156  | -,065 | ,045 | -,154 | ,025 |
|                   | Varianze<br>uguali non<br>presunte |       |       | -<br>1,43<br>8 | 30,0<br>00 | ,161  | -,065 | ,045 | -,156 | ,027 |
| 27.F.OC<br>C.T.   | Varianze<br>uguali<br>presunte     | 1,452 | ,233  | ,599           | 60         | ,551  | ,065  | ,108 | -,151 | ,280 |
|                   | Varianze<br>uguali non<br>presunte |       |       | ,599           | 59,3<br>85 | ,551  | ,065  | ,108 | -,151 | ,280 |
| 28.M.VIS<br>O.DP. | Varianze<br>uguali<br>presunte     | ,709  | ,403  | ,503           | 60         | ,617  | ,065  | ,128 | -,192 | ,321 |
|                   | Varianze<br>uguali non<br>presunte |       |       | ,503           | 59,9<br>90 | ,617  | ,065  | ,128 | -,192 | ,321 |
| 29.F.MA<br>SC.S.  | Varianze<br>uguali<br>presunte     | ,000  | 1,000 | ,000           | 60         | 1,000 | ,000  | ,076 | -,153 | ,153 |
|                   | Varianze<br>uguali non<br>presunte |       |       | ,000           | 60,0<br>00 | 1,000 | ,000  | ,076 | -,153 | ,153 |
| 30.M.OC<br>C.T.   | Varianze<br>uguali<br>presunte     | ,379  | ,541  | -,307          | 60         | ,760  | -,032 | ,105 | -,242 | ,178 |
|                   | Varianze<br>uguali non<br>presunte |       |       | -,307          | 59,8<br>08 | ,760  | -,032 | ,105 | -,242 | ,178 |
| 31.F.VIS<br>O.P.  | Varianze<br>uguali<br>presunte     | 1,214 | ,275  | ,552           | 60         | ,583  | ,065  | ,117 | -,169 | ,298 |
|                   | Varianze<br>uguali non<br>presunte |       |       | ,552           | 59,7<br>40 | ,583  | ,065  | ,117 | -,169 | ,298 |
| 32.M.MA<br>SC.R   | Varianze<br>uguali<br>presunte     | 4,901 | ,031  | -<br>1,07<br>4 | 60         | ,287  | -,097 | ,090 | -,277 | ,083 |
|                   | Varianze<br>uguali non<br>presunte |       |       | -<br>1,07<br>4 | 55,5<br>79 | ,287  | -,097 | ,090 | -,277 | ,084 |
| 33.F.OC<br>C.F.   | Varianze<br>uguali<br>presunte     | 1,394 | ,242  | -,584          | 60         | ,561  | -,032 | ,055 | -,143 | ,078 |

|                  |                                    |        |       |                |            |             |       |      |       |       |
|------------------|------------------------------------|--------|-------|----------------|------------|-------------|-------|------|-------|-------|
|                  | Varianze<br>uguali non<br>presunte |        |       | -584           | 54,4<br>84 | ,562        | -,032 | ,055 | -,143 | ,078  |
| 34.F.NIQ<br>.P.  | Varianze<br>uguali<br>presunte     | 1,514  | ,223  | -<br>1,01<br>3 | 60         | ,315        | -,129 | ,127 | -,384 | ,126  |
|                  | Varianze<br>uguali non<br>presunte |        |       | -<br>1,01<br>3 | 59,9<br>61 | ,315        | -,129 | ,127 | -,384 | ,126  |
| 35.F.OC<br>C.S.  | Varianze<br>uguali<br>presunte     | 22,766 | ,000  | -<br>2,11<br>3 | 60         | <u>,039</u> | -,194 | ,092 | -,377 | -,010 |
|                  | Varianze<br>uguali non<br>presunte |        |       | -<br>2,11<br>3 | 47,2<br>04 | ,040        | -,194 | ,092 | -,378 | -,009 |
| 36.M.VIS<br>O.DG | Varianze<br>uguali<br>presunte     | 12,934 | ,001  | 1,75<br>7      | 60         | ,084        | ,194  | ,110 | -,027 | ,414  |
|                  | Varianze<br>uguali non<br>presunte |        |       | 1,75<br>7      | 56,2<br>79 | ,084        | ,194  | ,110 | -,027 | ,414  |
| 37.F.NIQ<br>.S.  | Varianze<br>uguali<br>presunte     | 3,956  | ,051  | 1,05<br>4      | 60         | ,296        | ,129  | ,122 | -,116 | ,374  |
|                  | Varianze<br>uguali non<br>presunte |        |       | 1,05<br>4      | 59,5<br>86 | ,296        | ,129  | ,122 | -,116 | ,374  |
| 38.F.OC<br>C.DG. | Varianze<br>uguali<br>presunte     | ,000   | 1,000 | ,000           | 60         | 1,000       | ,000  | ,108 | -,216 | ,216  |
|                  | Varianze<br>uguali non<br>presunte |        |       | ,000           | 60,0<br>00 | 1,000       | ,000  | ,108 | -,216 | ,216  |
| 39.M.VIS<br>O.R. | Varianze<br>uguali<br>presunte     | ,000   | 1,000 | ,000           | 60         | 1,000       | ,000  | ,128 | -,257 | ,257  |
|                  | Varianze<br>uguali non<br>presunte |        |       | ,000           | 60,0<br>00 | 1,000       | ,000  | ,128 | -,257 | ,257  |
| 40.F.MA<br>SC.P. | Varianze<br>uguali<br>presunte     | 4,211  | ,045  | -<br>1,29<br>1 | 60         | ,202        | -,161 | ,125 | -,411 | ,089  |
|                  | Varianze<br>uguali non<br>presunte |        |       | -<br>1,29<br>1 | 59,7<br>35 | ,202        | -,161 | ,125 | -,411 | ,089  |

|                   |                                    |       |       |           |            |       |       |      |       |      |
|-------------------|------------------------------------|-------|-------|-----------|------------|-------|-------|------|-------|------|
| 41.M.OC<br>C.DP.  | Varianze<br>uguali<br>presunte     | ,709  | ,403  | ,503      | 60         | ,617  | ,065  | ,128 | -,192 | ,321 |
|                   | Varianze<br>uguali non<br>presunte |       |       | ,503      | 59,9<br>90 | ,617  | ,065  | ,128 | -,192 | ,321 |
| 42.F.NIQ<br>.R.   | Varianze<br>uguali<br>presunte     | 4,088 | ,048  | ,989      | 60         | ,327  | ,097  | ,098 | -,099 | ,292 |
|                   | Varianze<br>uguali non<br>presunte |       |       | ,989      | 57,2<br>92 | ,327  | ,097  | ,098 | -,099 | ,293 |
| 43.F.OC<br>C.DP.  | Varianze<br>uguali<br>presunte     | ,254  | ,616  | ,255      | 60         | ,800  | ,032  | ,127 | -,221 | ,285 |
|                   | Varianze<br>uguali non<br>presunte |       |       | ,255      | 59,9<br>90 | ,800  | ,032  | ,127 | -,221 | ,285 |
| 45.F.VIS<br>O.DG. | Varianze<br>uguali<br>presunte     | 3,156 | ,081  | ,881      | 60         | ,382  | ,097  | ,110 | -,123 | ,317 |
|                   | Varianze<br>uguali non<br>presunte |       |       | ,881      | 58,8<br>80 | ,382  | ,097  | ,110 | -,123 | ,317 |
| 46.M.OC<br>C.P.   | Varianze<br>uguali<br>presunte     | ,000  | 1,000 | ,000      | 60         | 1,000 | ,000  | ,117 | -,234 | ,234 |
|                   | Varianze<br>uguali non<br>presunte |       |       | ,000      | 60,0<br>00 | 1,000 | ,000  | ,117 | -,234 | ,234 |
| 47.F.NIQ<br>.DP.  | Varianze<br>uguali<br>presunte     | 1,214 | ,275  | ,552      | 60         | ,583  | ,065  | ,117 | -,169 | ,298 |
|                   | Varianze<br>uguali non<br>presunte |       |       | ,552      | 59,7<br>40 | ,583  | ,065  | ,117 | -,169 | ,298 |
| 48.F.MA<br>SC.DG. | Varianze<br>uguali<br>presunte     | ,342  | ,561  | -,292     | 60         | ,771  | -,032 | ,110 | -,253 | ,189 |
|                   | Varianze<br>uguali non<br>presunte |       |       | -,292     | 59,8<br>76 | ,771  | -,032 | ,110 | -,253 | ,189 |
| 49.M.MA<br>SC.DP. | Varianze<br>uguali<br>presunte     | 8,379 | ,005  | 1,38<br>0 | 60         | ,173  | ,129  | ,093 | -,058 | ,316 |

|                                    |  |  |           |            |      |      |      |       |      |
|------------------------------------|--|--|-----------|------------|------|------|------|-------|------|
| Varianze<br>uguali non<br>presunte |  |  | 1,38<br>0 | 54,0<br>00 | ,173 | ,129 | ,093 | -,058 | ,316 |
|------------------------------------|--|--|-----------|------------|------|------|------|-------|------|
